# Supplementary material for: CDC20 Is Regulated by the Histone Methyltransferase, KMT5A, in Castration-Resistant Prostate Cancer
Source: MDPI journal article supplement (doi:10.3390/cancers15143597), 2023-07-13

5 minute exposure

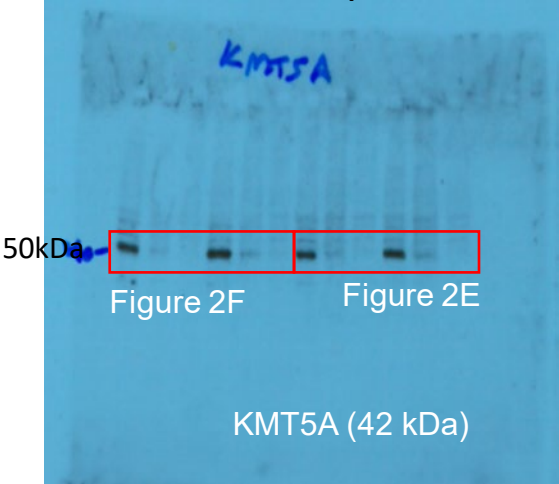

10 minute exposure

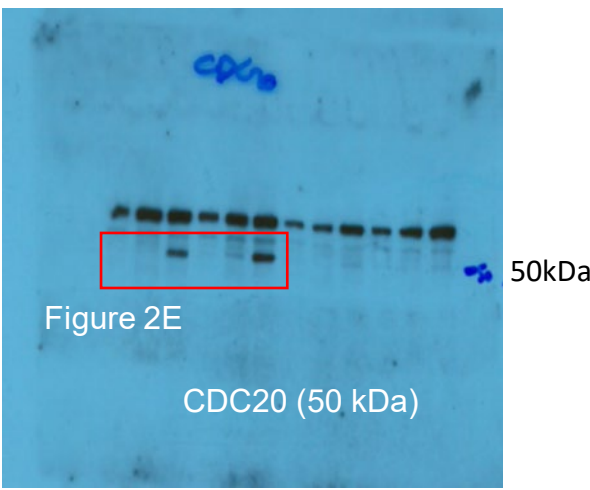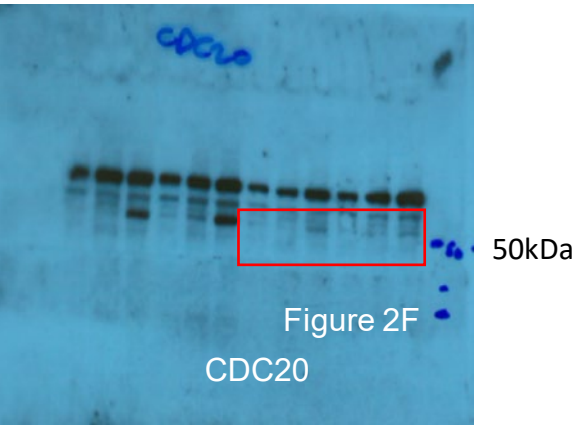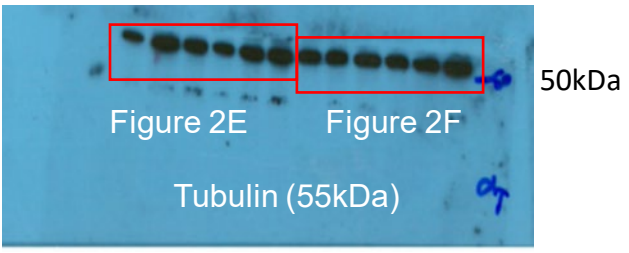

- 1. Marker
- 2. LNCaP N/S SDM
- 3. LNCaP KMT5A\_1 SDM
- 4. LNCaP KMT5A\_2 SDM
- 5. LNCaP N/S + 10nM DHT 24h
- 6. LNCaP KMT5A\_1 + 10nM DHT 24h
- 7. LNCaP KMT5A\_2 + 10nM DHT 24h
- 8. LNCaP-AI N/S SDM
- 9. LNCaP-AI KMT5A\_1 SDM
- 10. LNCaP-AI KMT5A\_2 SDM
- 11. LNCaP-AI N/S + 10nM DHT 24h
- 12. LNCaP-AI KMT5A\_1 + 10nM DHT 24h
- 13. LNCaP-AI KMT5A\_2 + 10nM DHT 24h

Uncut blots for Figure 3A; ChemiDoc (BioRad) images

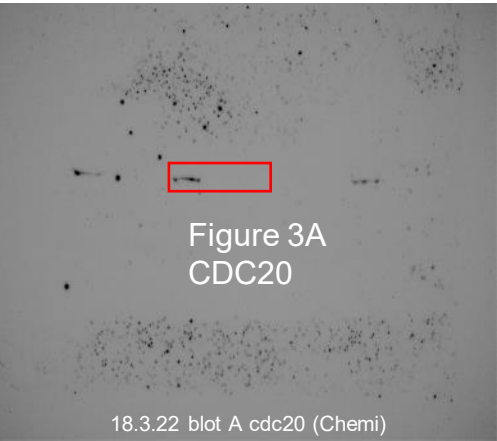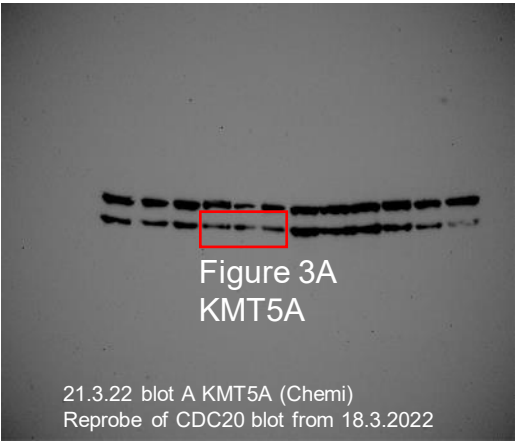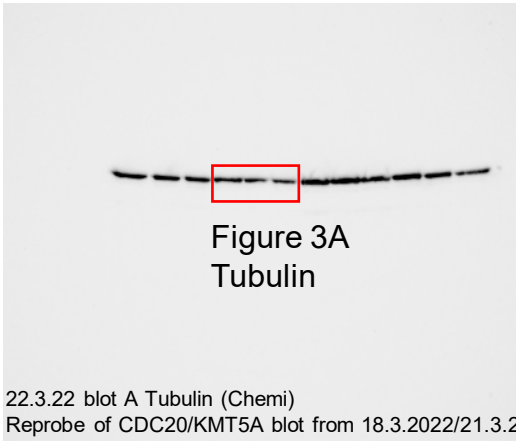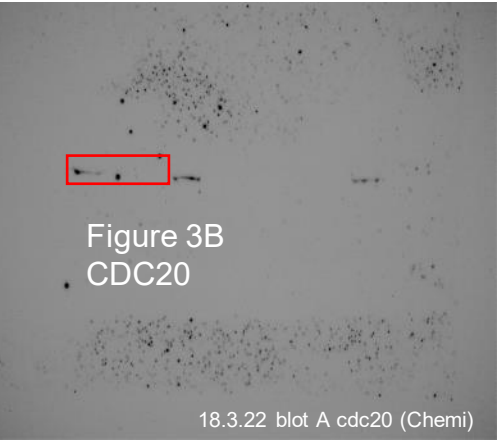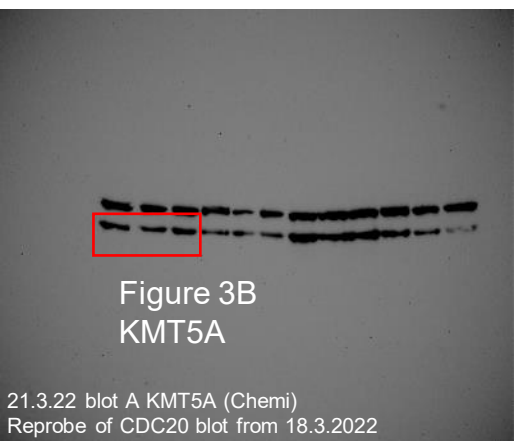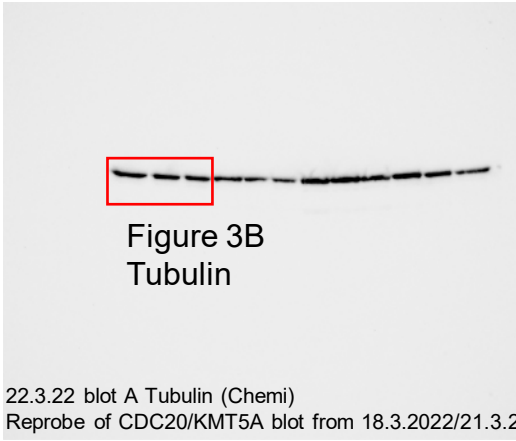

- |                          |           |
|--------------------------|-----------|
| 1. Marker                | N=3.3.22  |
| 2. LNCaP N/S             |           |
| 3. LNCaP KMT5A_1         |           |
| 4. LNCaP KMT5A_2         |           |
| 5. LNCaP-AI N/S SDM      |           |
| 6. LNCaP-AI KMT5A_1 SDM  |           |
| 7. LNCaP-AI KMT5A_2 SDM  |           |
| 8. LNCaP N/S             |           |
| 9. LNCaP KMT5A_1         | N =7.3.22 |
| 10. LNCaP KMT5A_2        |           |
| 11. LNCaP-AI N/S SDM     |           |
| 12. LNCaP-AI KMT5A_1 SDM |           |
| 13. LNCaP-AI KMT5A_2 SDM |           |

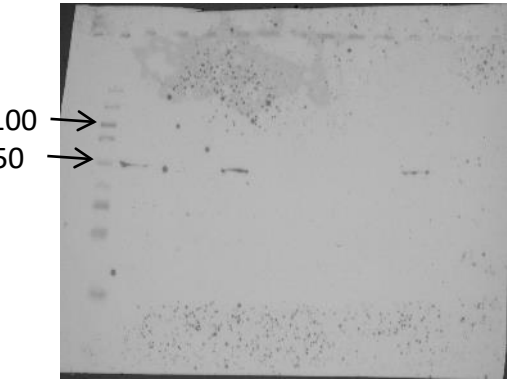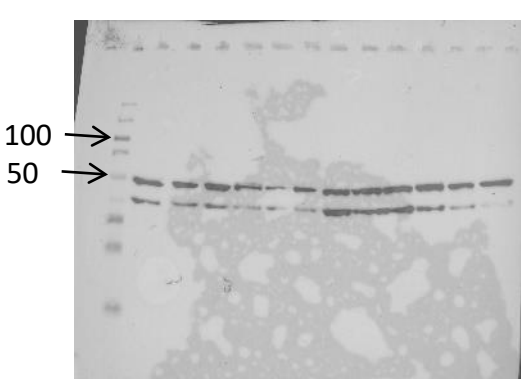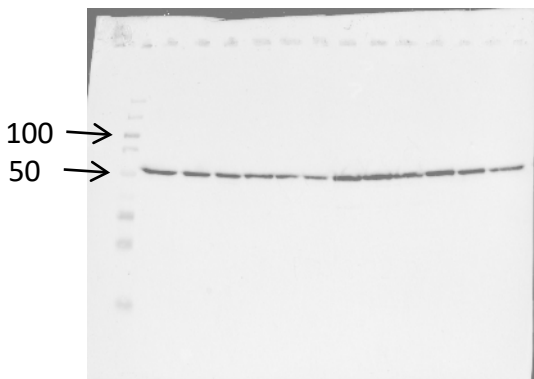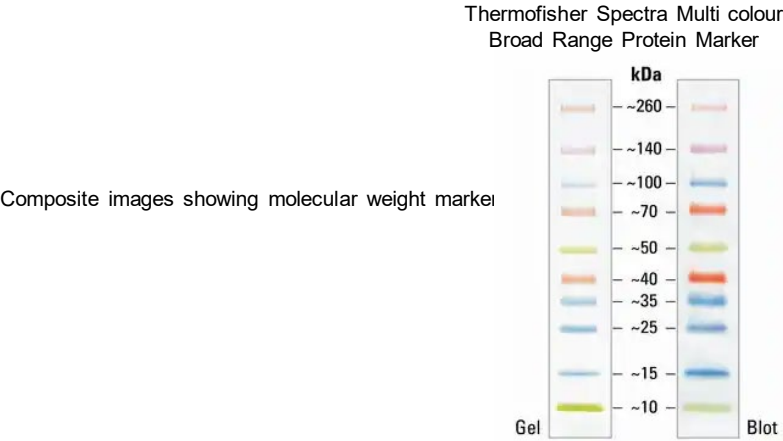

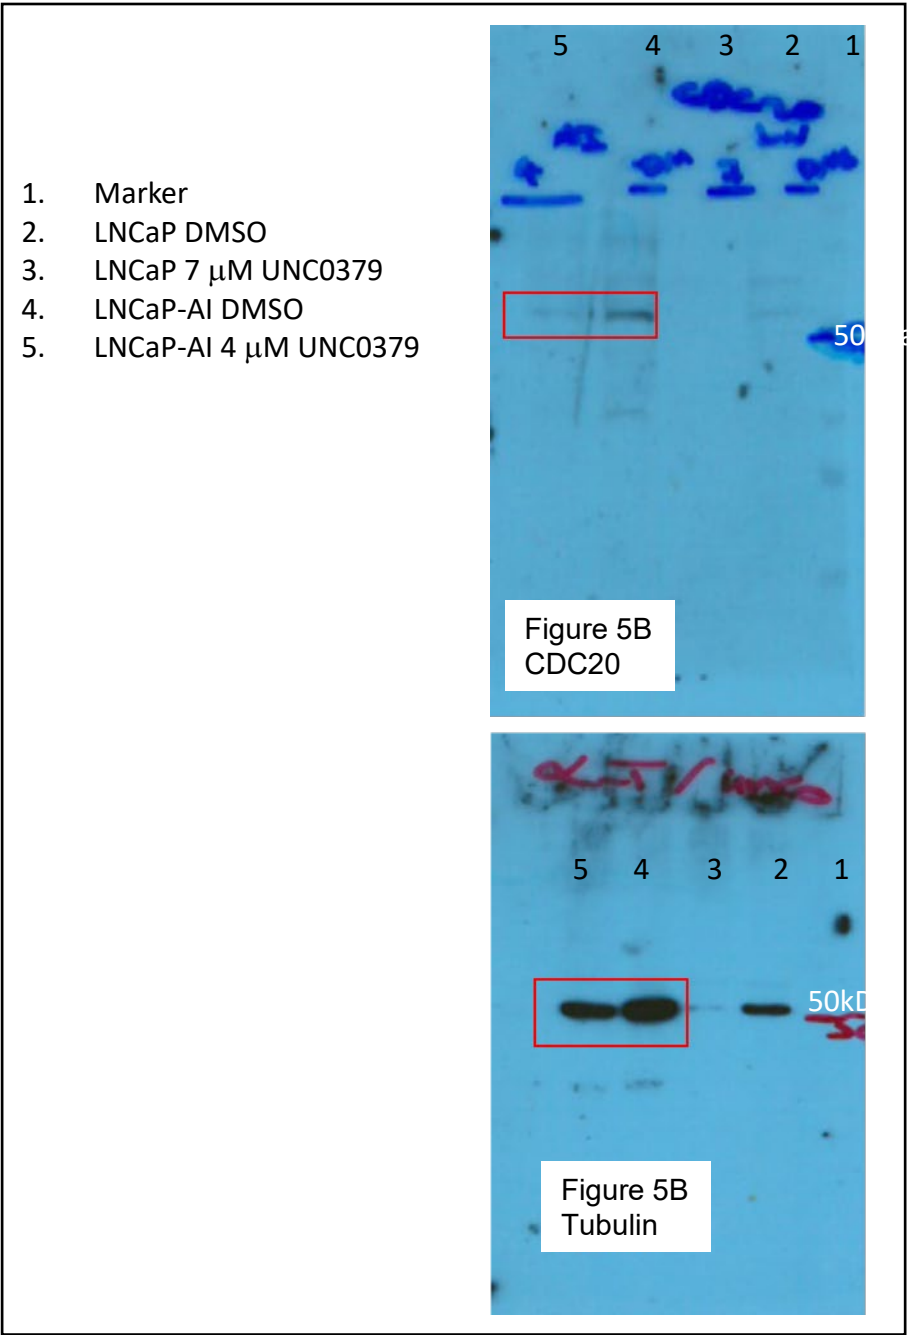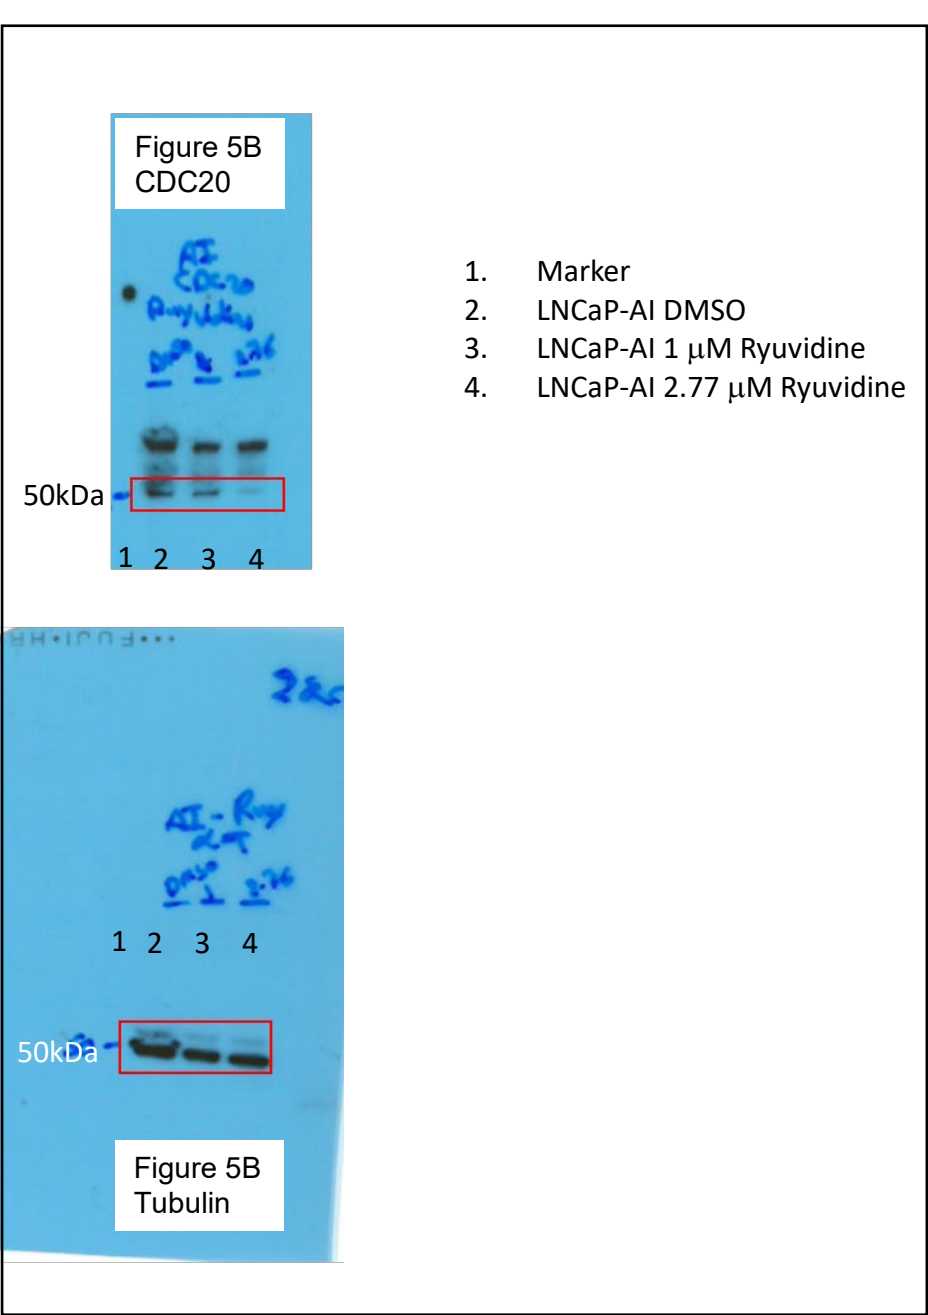

Uncut blots for Figure 5C; lab book 3 p0074

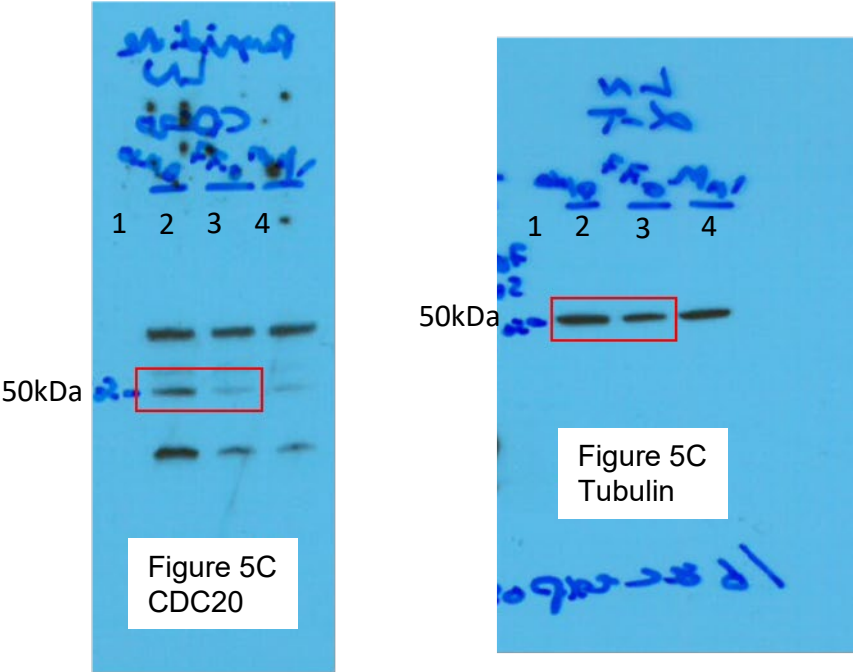

- 1. Marker
- 2. LNCaP DMSO
- 3. LNCaP 0.77  $\mu$ M Ryuvidine
- 4. LNCaP 1  $\mu$ M Ryuvidine

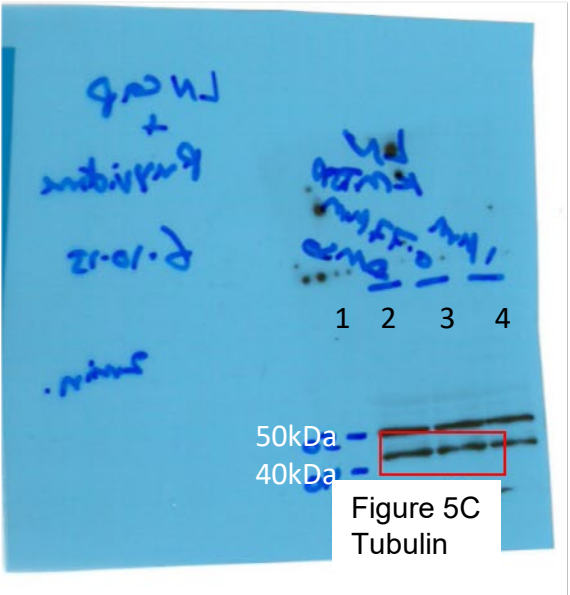

Uncut blots for Figure 7B; LNCaP-AI

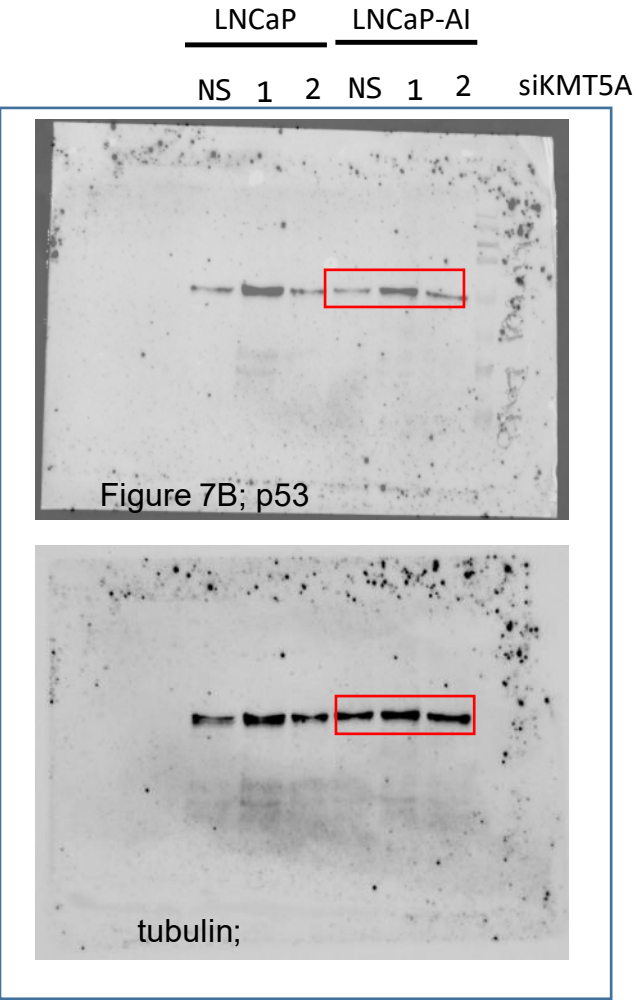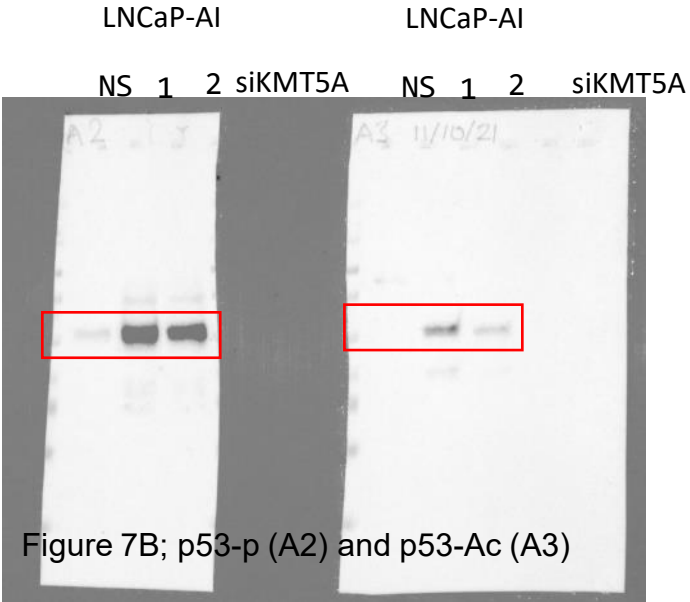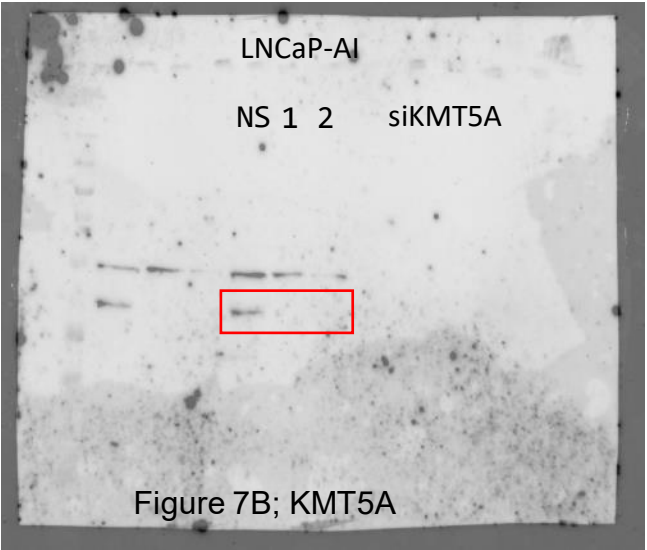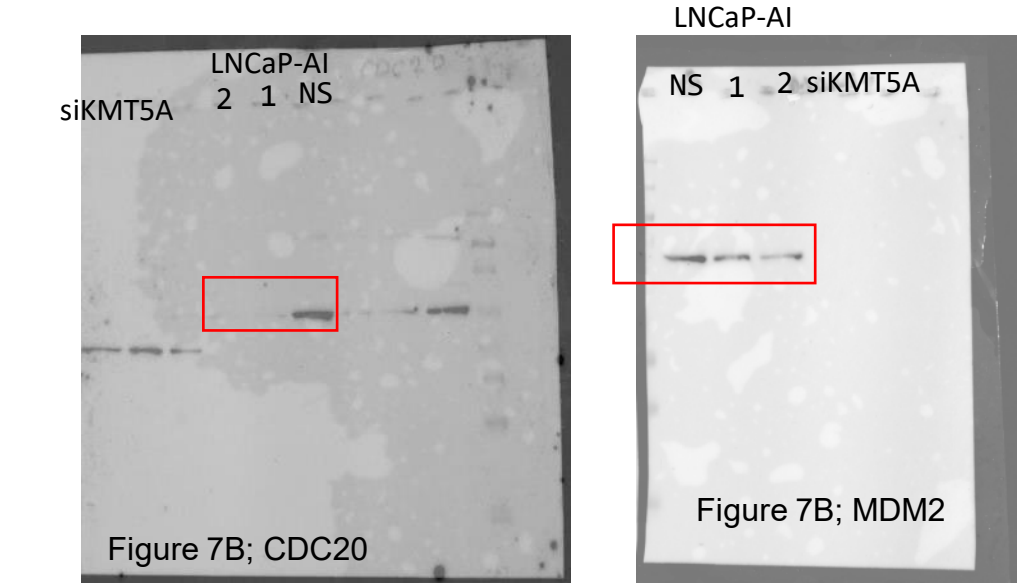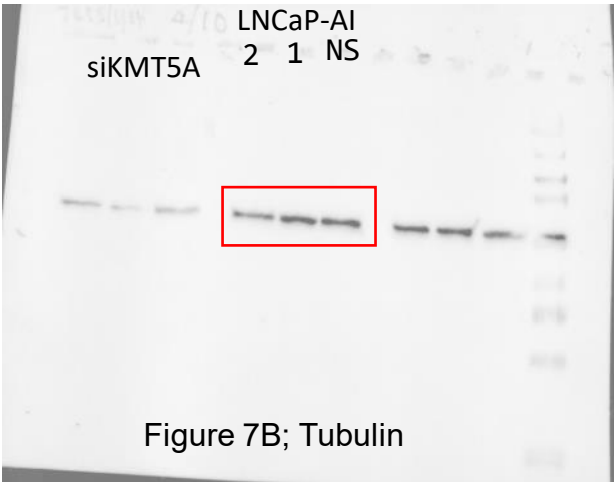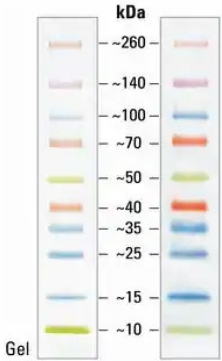



Uncut blots for Figure 7B; LNCaP

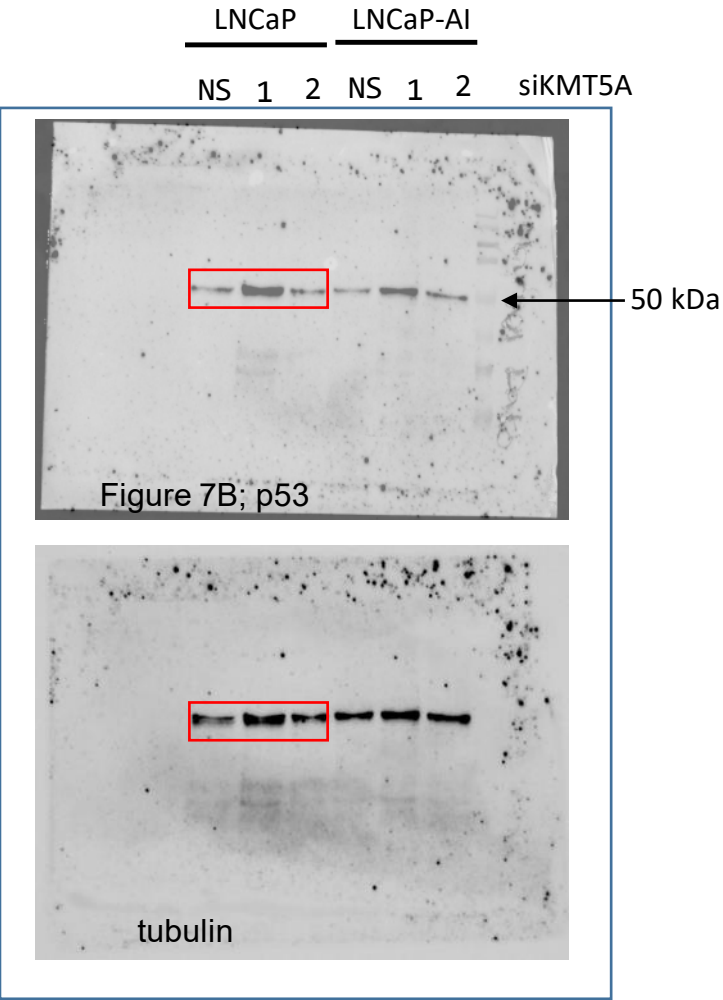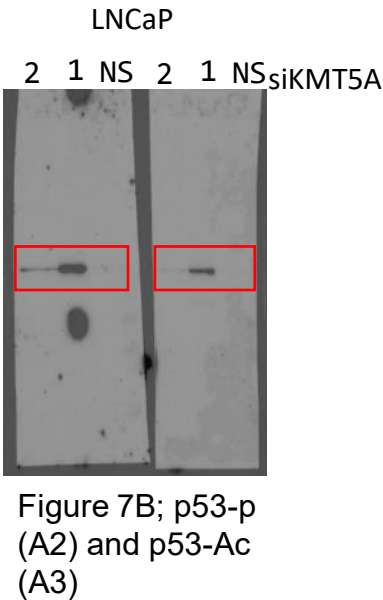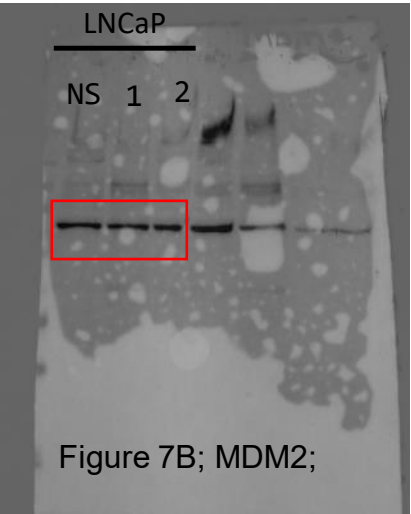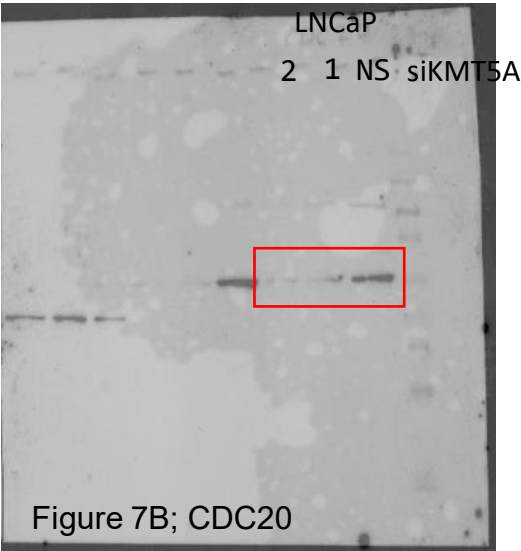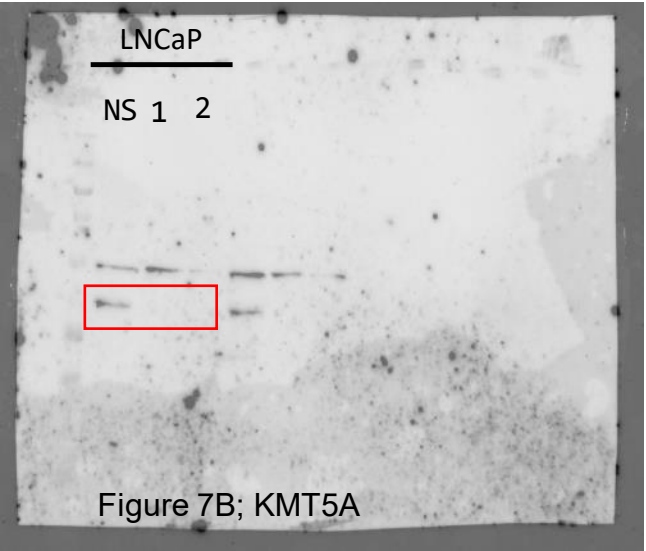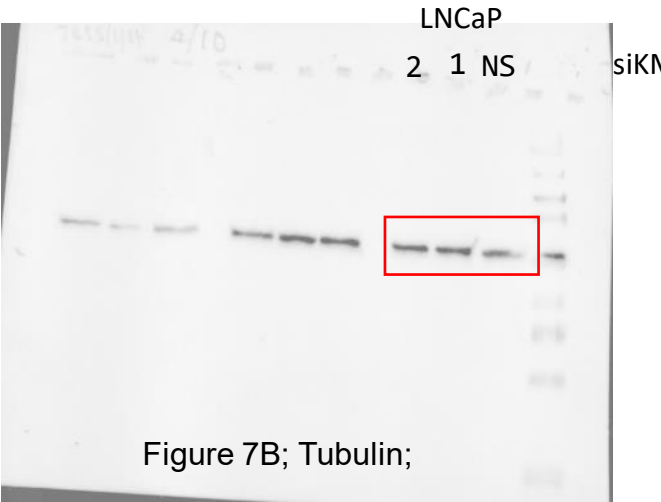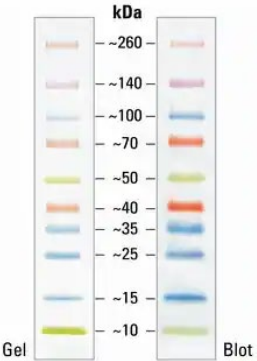

Uncropped blots for Figure 7D;

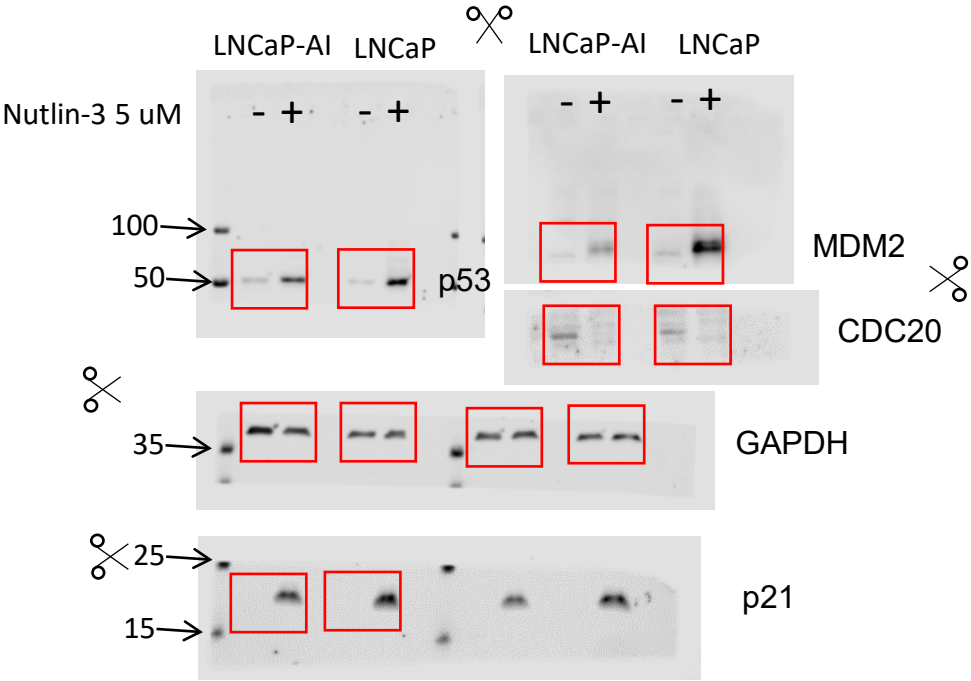

Uncropped blots for Figure 8

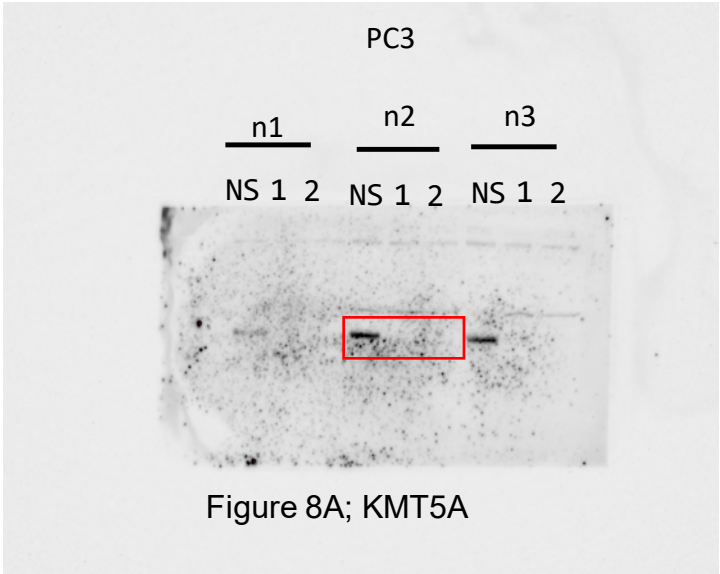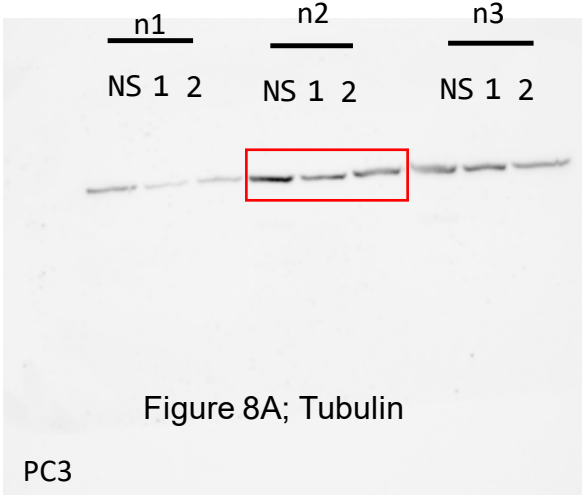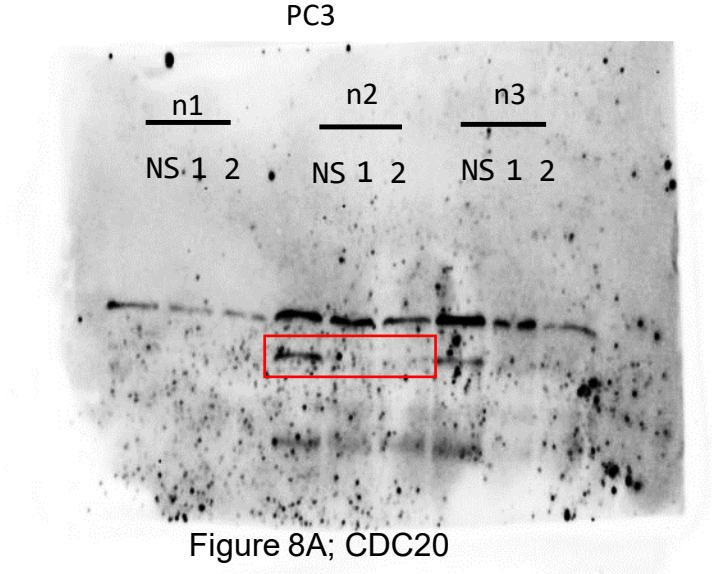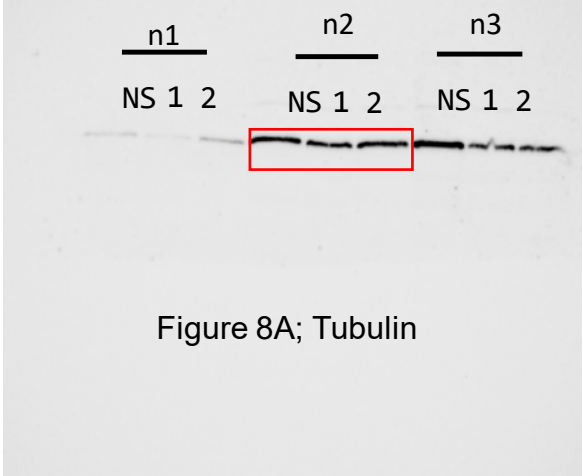



Supplementary Figure 2 uncut blots

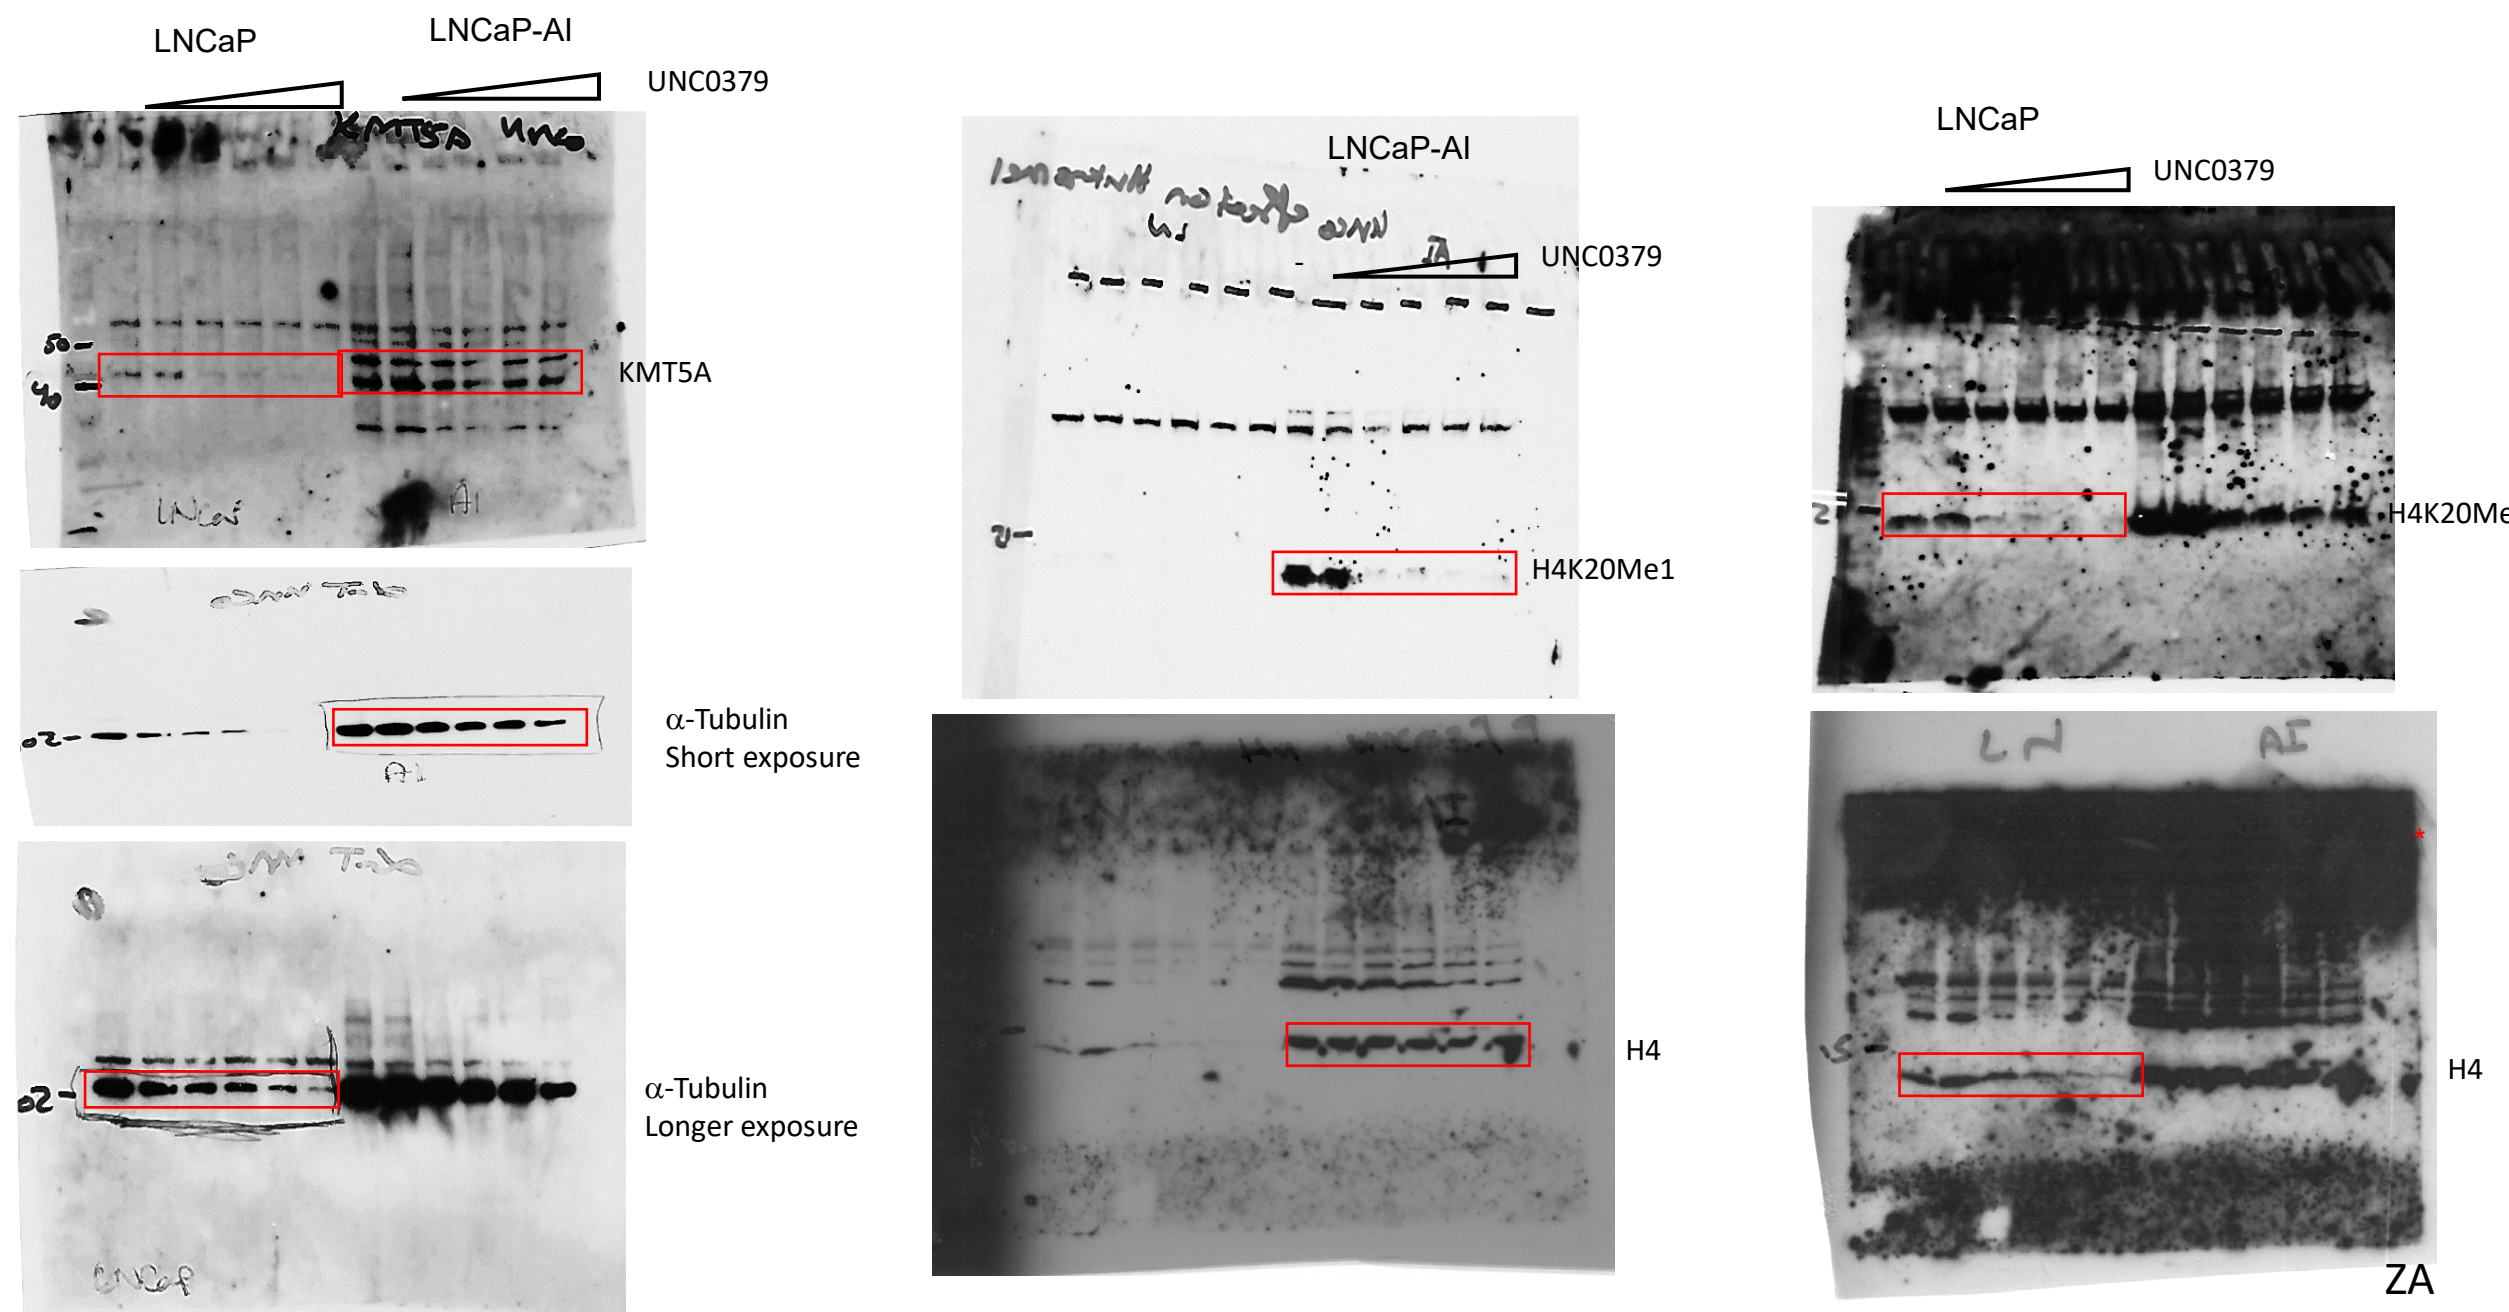

Supplementary Figure 3 uncut blots

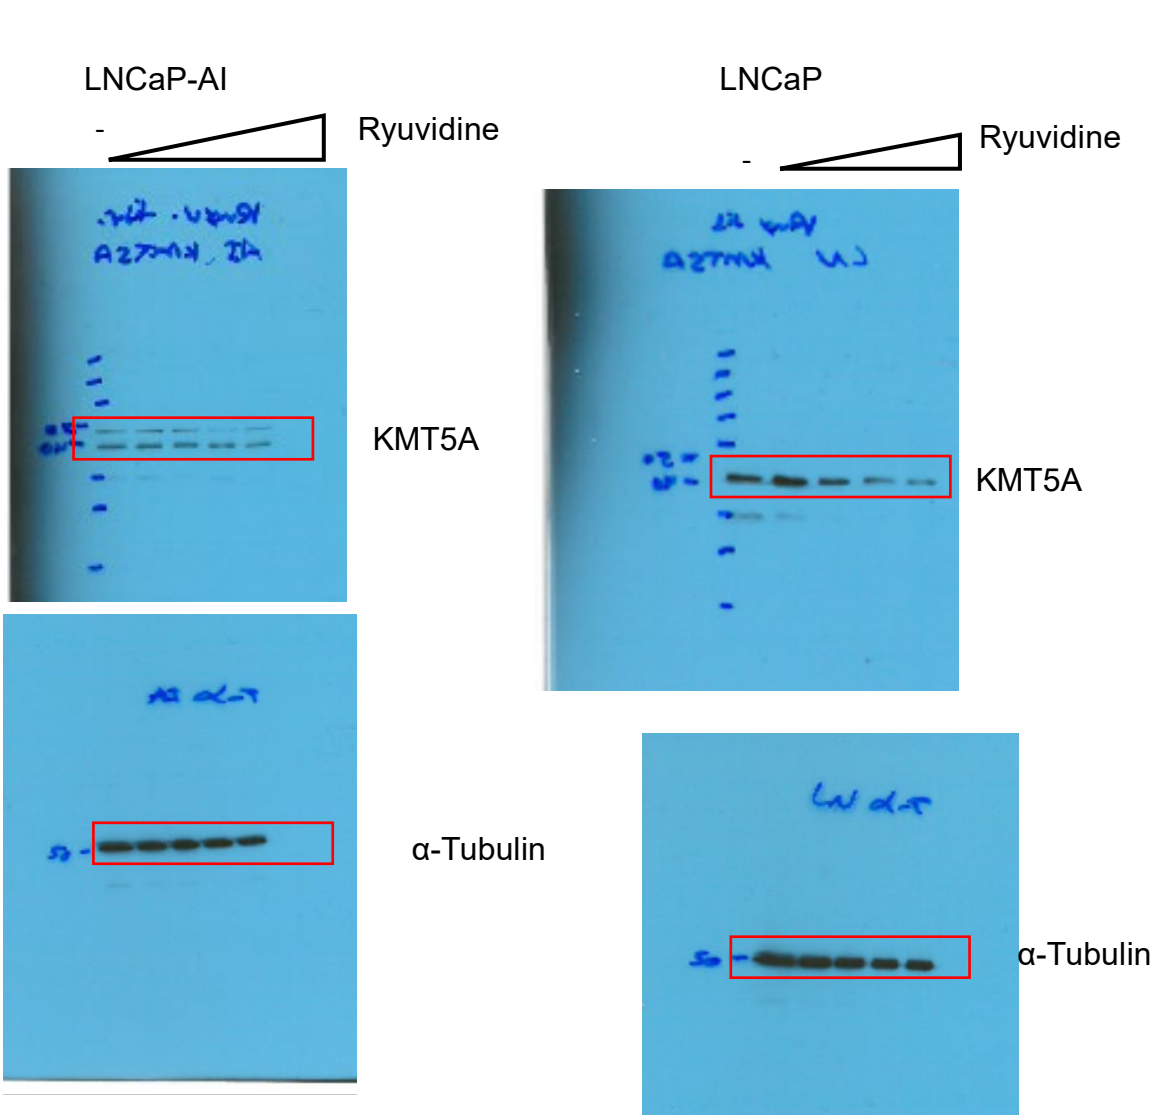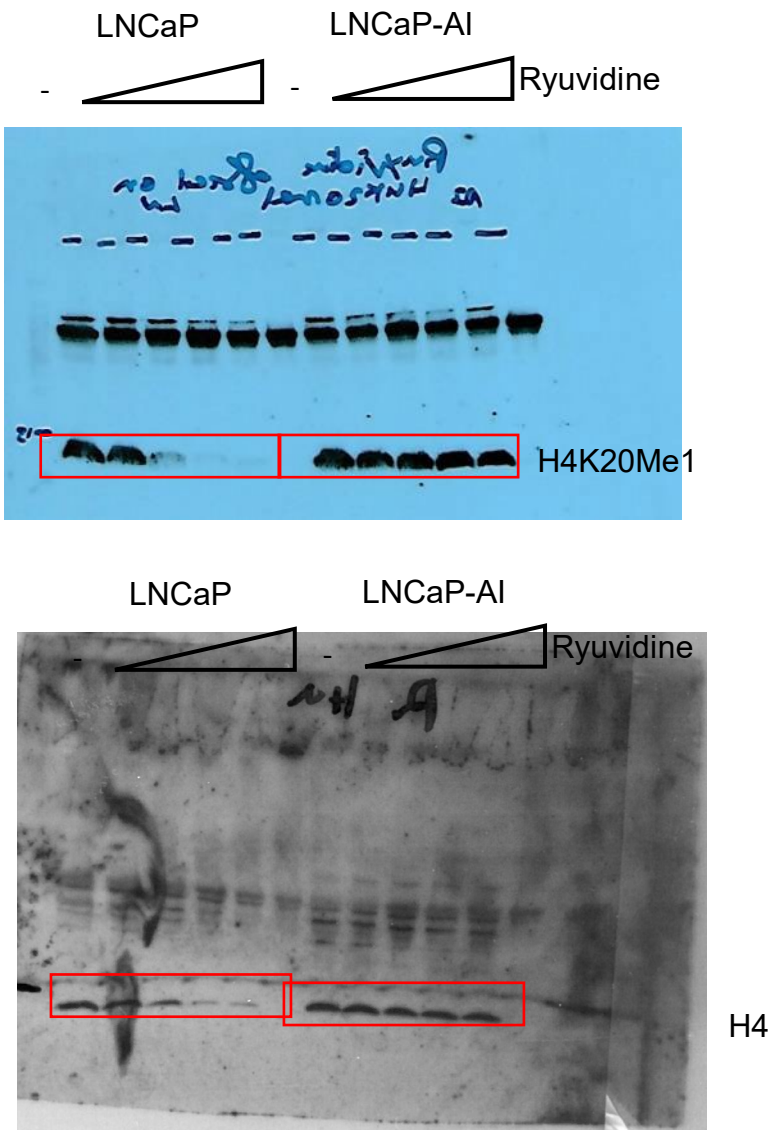

Supplementary Figure 5 uncut blots

LNCaP

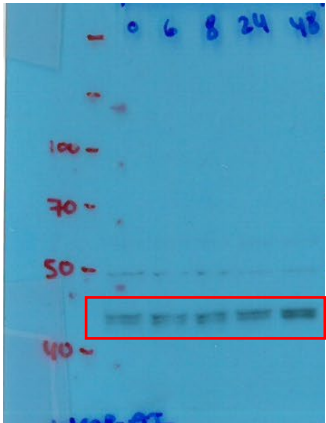

LNCaP

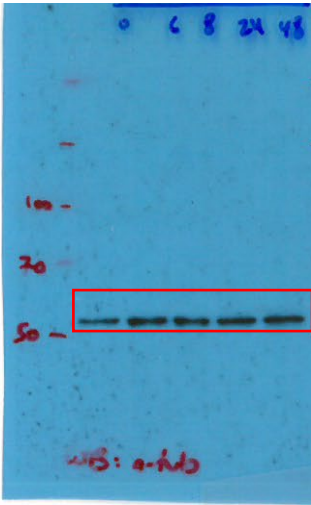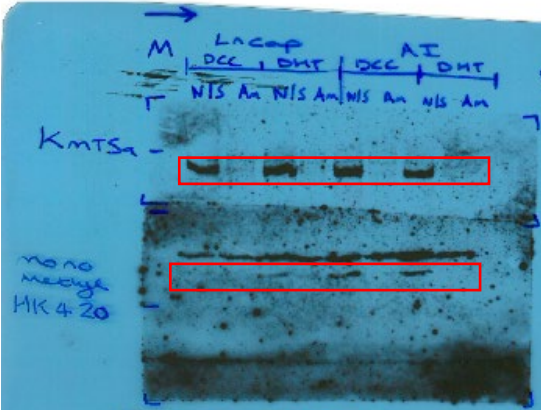

LNCaP-AI

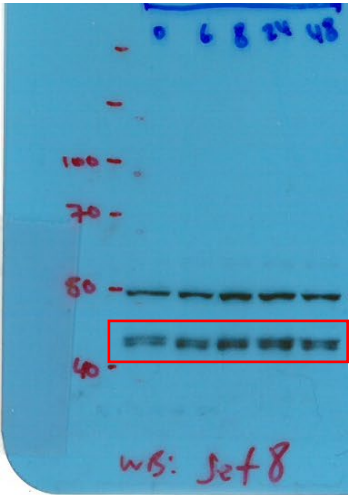

LNCaP-AI

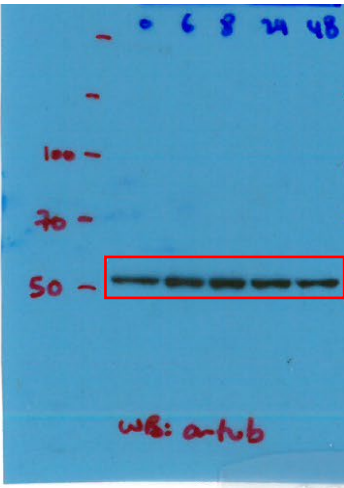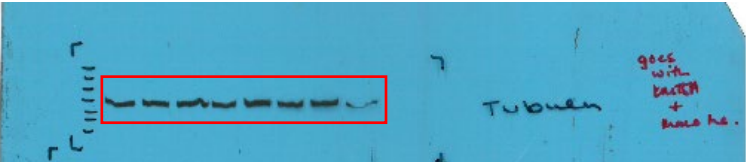



Supplementary Figure 6A uncut blots

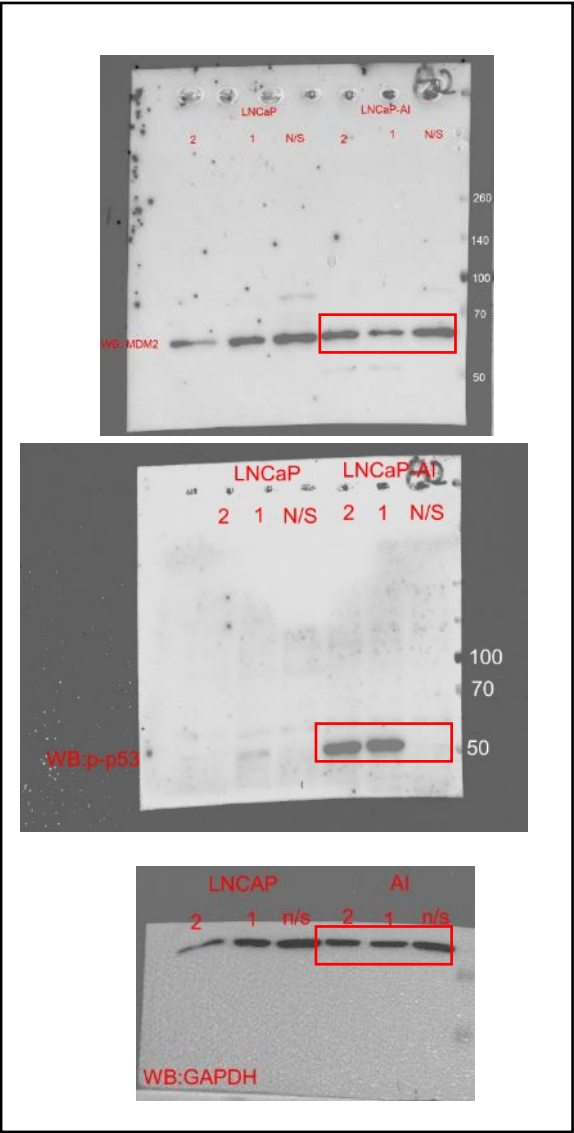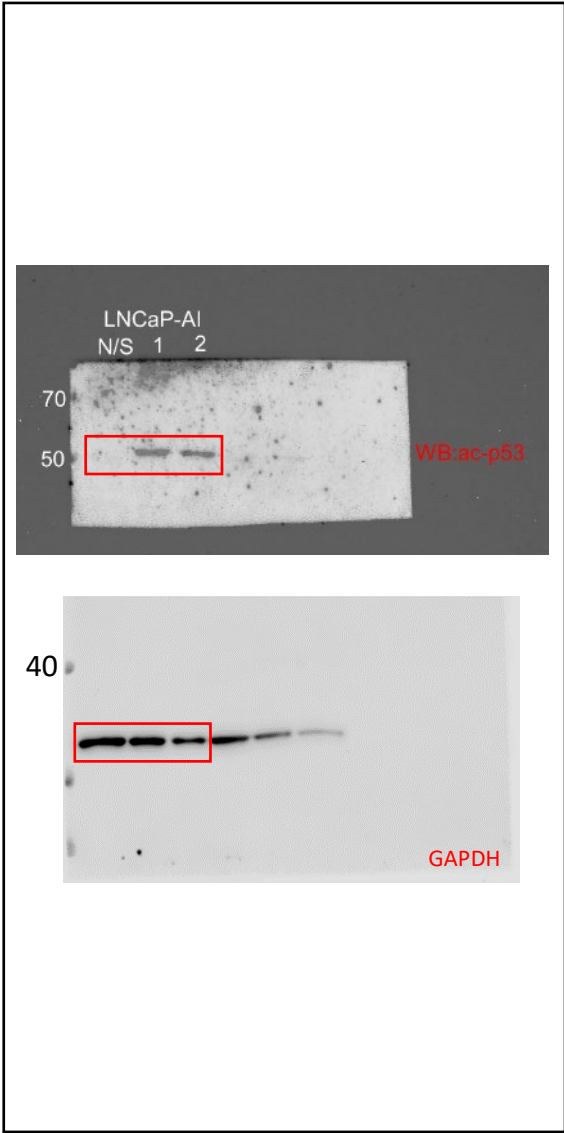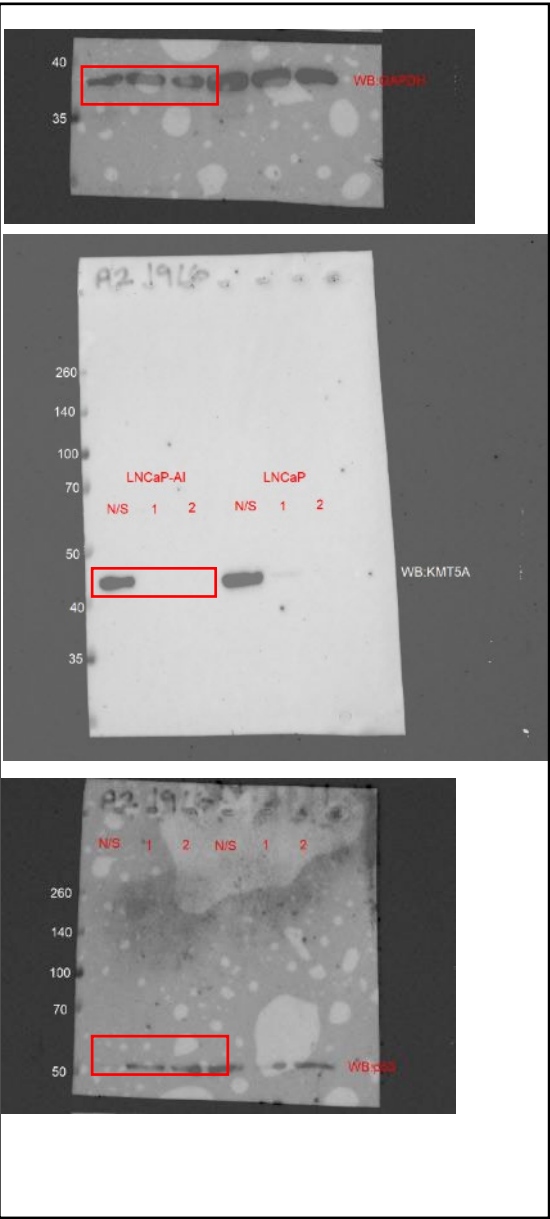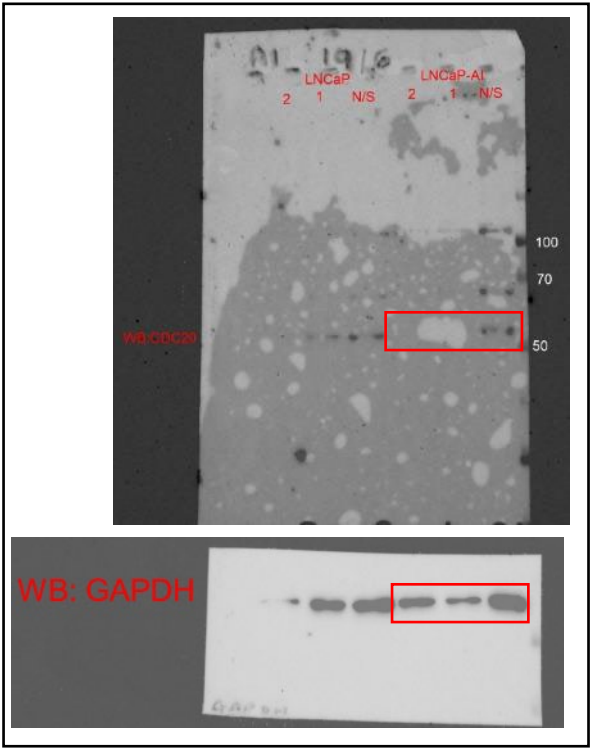

LNCaP-AI uncut blot experimental repeat 3

Supplementary Figure 6A uncut blots

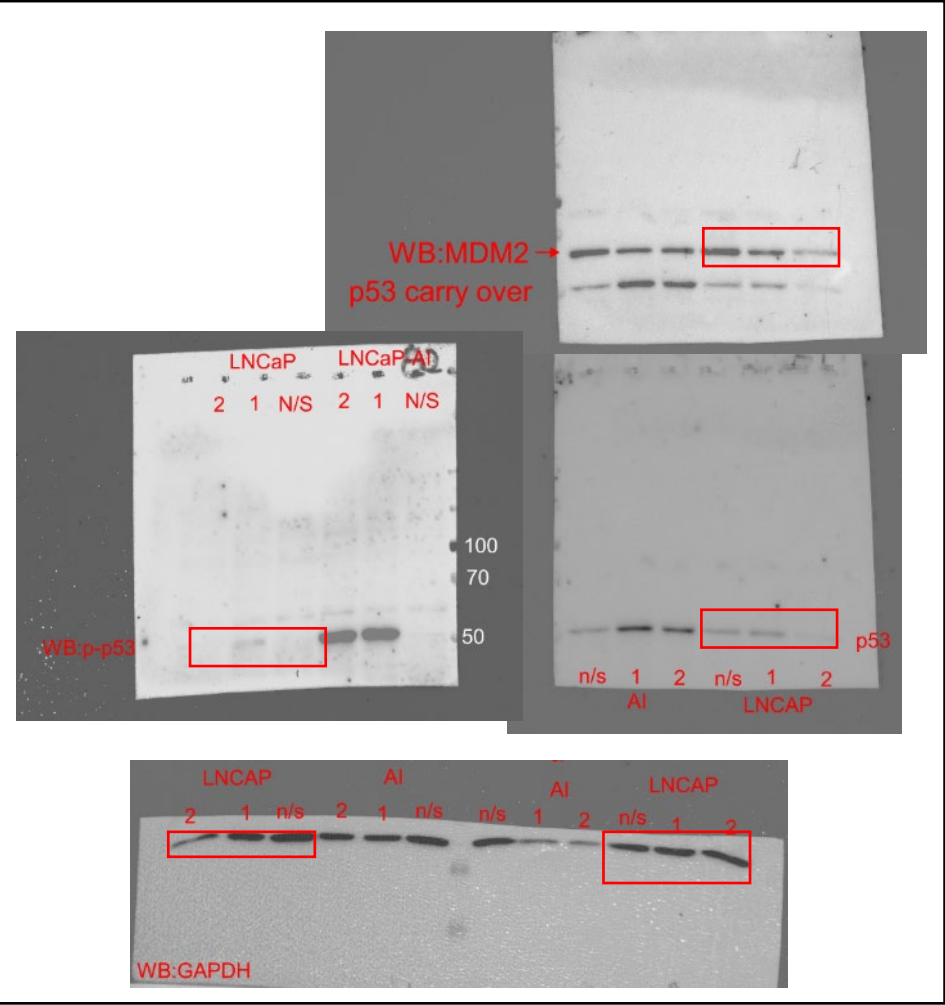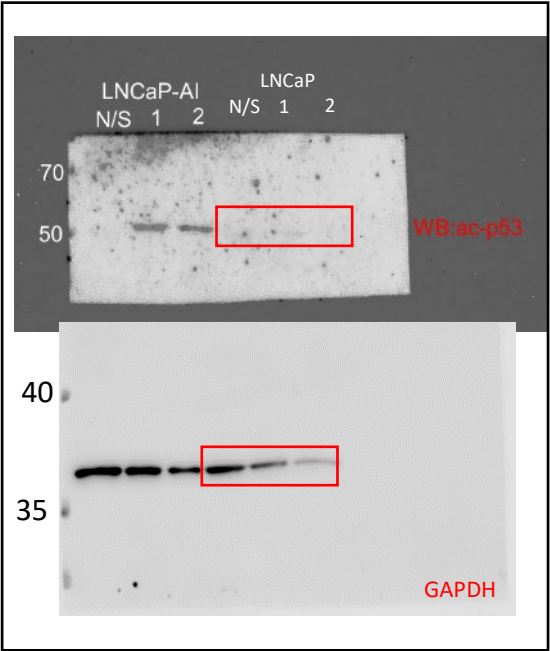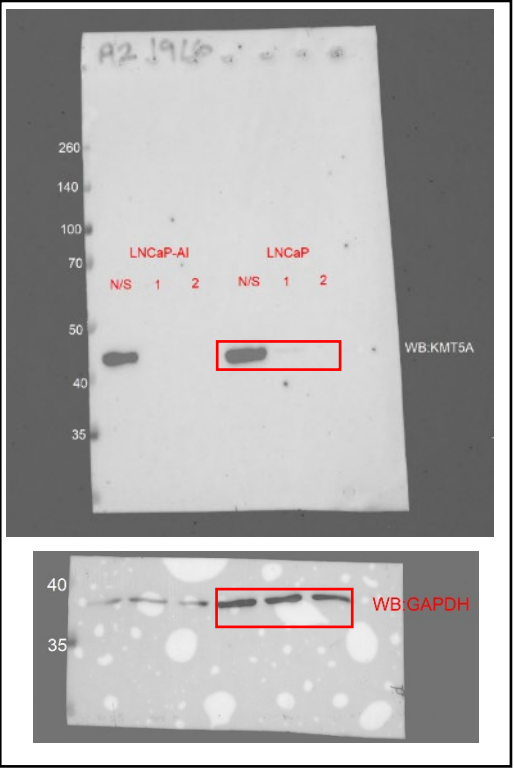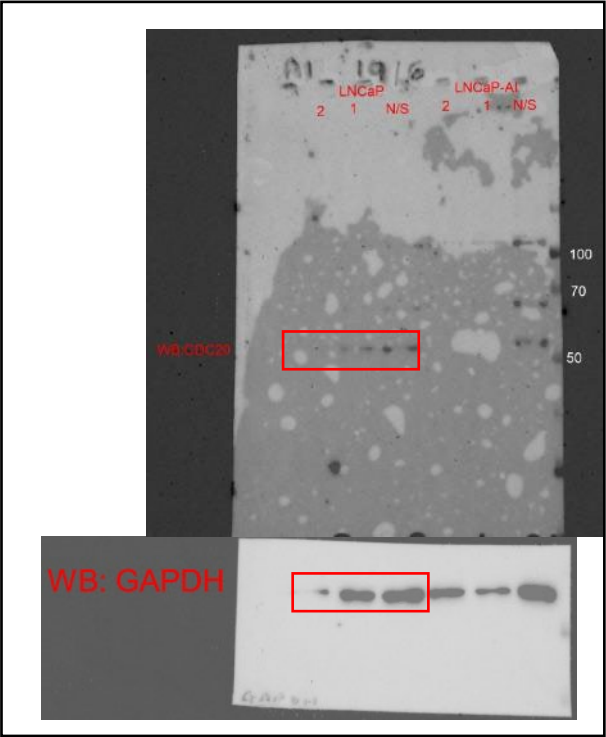

LNCaP uncut blot experimental repeat 3

Supplementary Figure 6B uncut blots

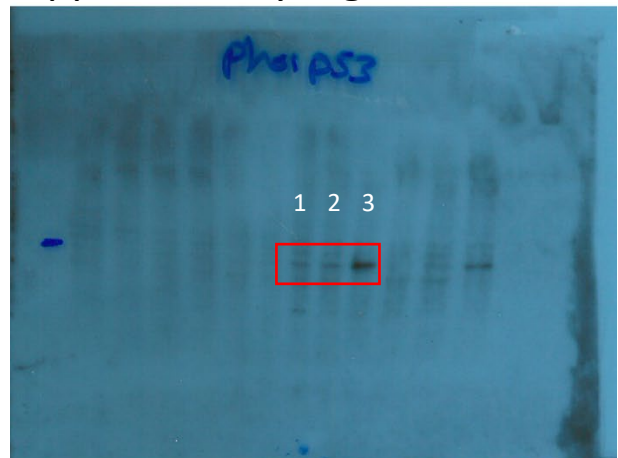

P53-p

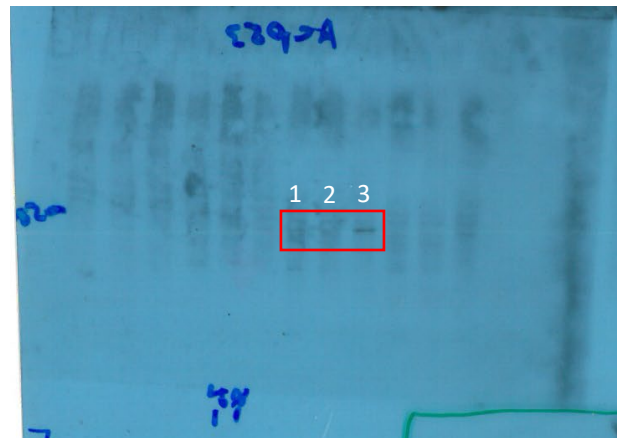

P53-Ac

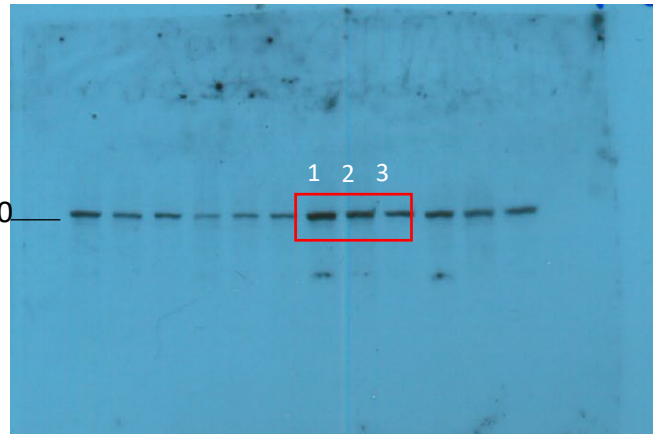

p53

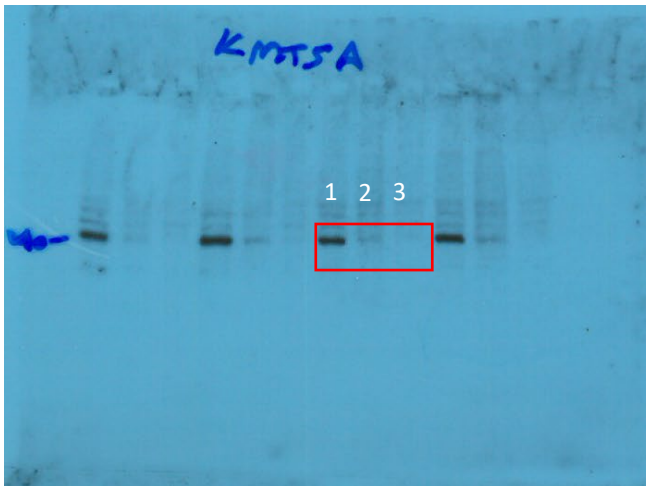

KMT5A

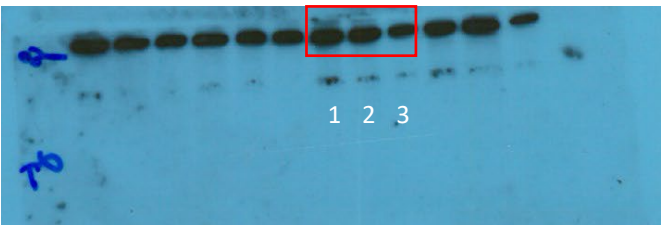

Tubulin

- 1. N/S
- 2. siKMT5A\_1
- 3. siKMT5A\_2

LNCaP-AI uncut blot experimental repeat 1



Supplementary Figure 6B uncut blots

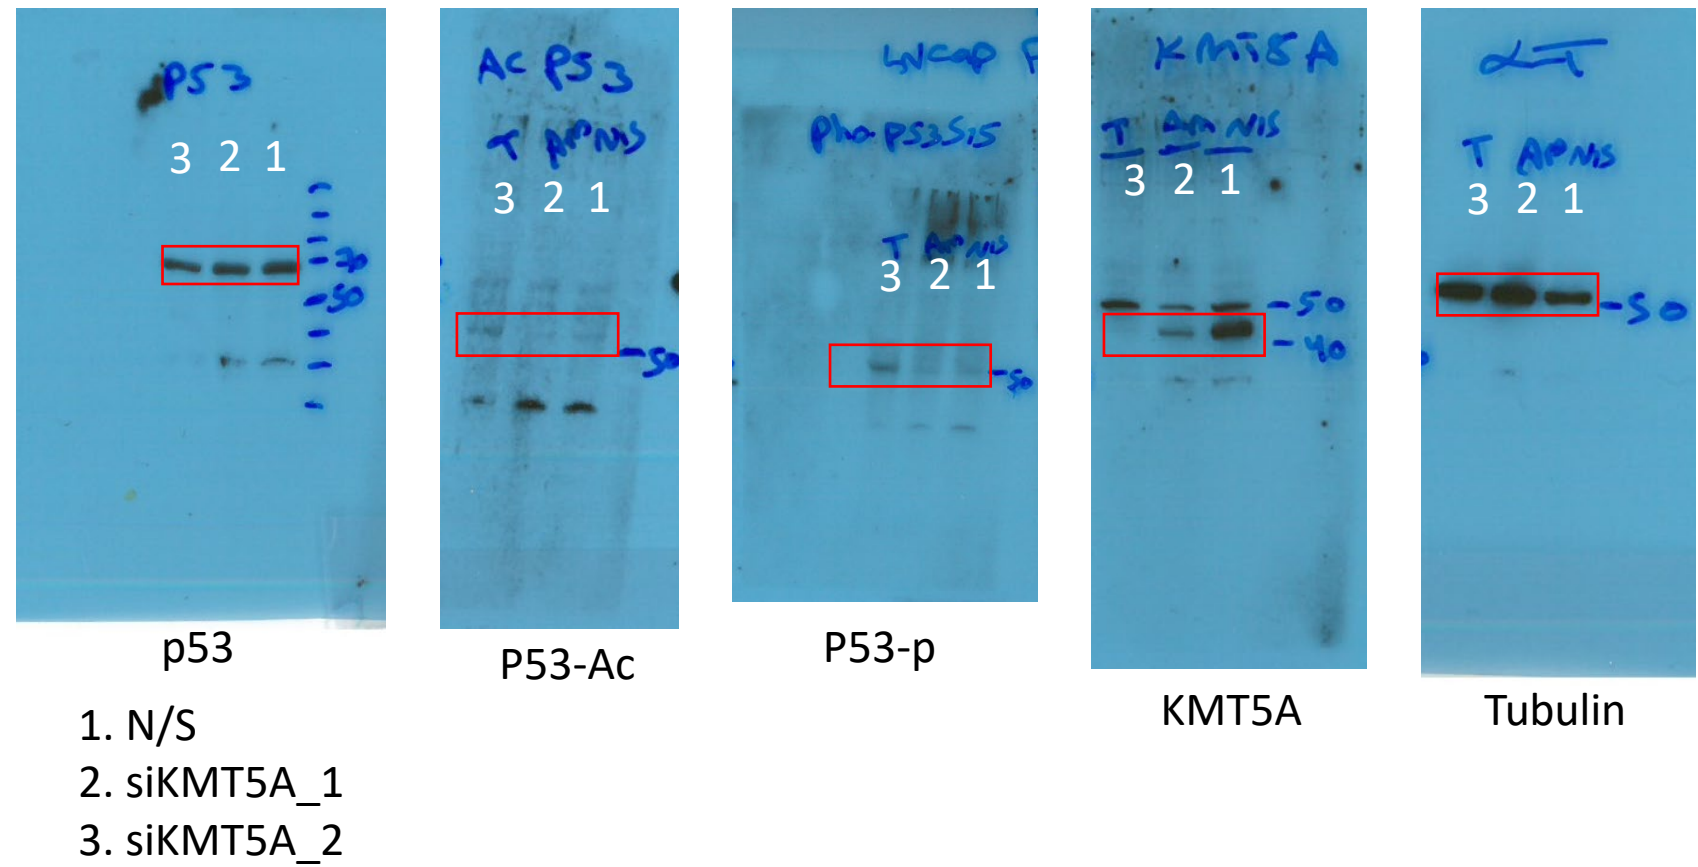

Supplement: s1 [file s1]
