# Supplementary material for: CDC20 Is Regulated by the Histone Methyltransferase, KMT5A, in Castration-Resistant Prostate Cancer
Source: Cancers (Basel). 2023 Jul 13;15(14):3597. doi: 10.3390/cancers15143597 (PMC10377584; doi:10.3390/cancers15143597)
Supplement: Supplementary file 1 [file cancers-15-03597-s001.zip › Supplementary Tables.xlsx]

## Sheet: S1. Primer Sequences
Gene	Forward Primer	Reverse Primer
CDC20	TCGCATCTGGAATGTGTGCT	CCGGGATGTGTGACCTTTGA
KMT5A	AACCTACTGCGTGGATGCAAC	CGTCGATGTCGTGCAGTTTG
HPRT1	TTGCTTTCCTTGGTCAGGCA	AGCTTGCGACCTTGACCATCT
CDC20 promoter	CCGCTAGACTCTCGTGATAGC	TGGCTCCTTCAAAATCCAAC

## Sheet: S2. Up-regulated genes
Supplementary Table 2: Genes significantly up-regulated by KMT5A knockdown
KMT5A siRNA	#1		#2		n=408	n=144
+DHT	logfc	adj. p-value	logfc	adj. p-value	Mean logfc	AR regulated
GDF15			-2.61887	0.0157782	-2.61887	Yes
TLE1	-1.96274	0.0171921			-1.96274	Yes
DDC	-1.78973	0.0264247			-1.78973	Yes
H2AFJ	-1.61265	0.00654787			-1.61265
HIST2H2AA4	-1.58523	0.00590374			-1.58523
PRUNE2	-1.55067	0.0365881			-1.55067
HIST2H2AA3	-1.62358	0.00536728	-1.44206	0.0156039	-1.53282
CRYAB	-1.5208	0.00751898			-1.5208
FAXDC2	-1.44529	0.0213039			-1.44529	Yes
SNORA63	-1.4256	0.0356377			-1.4256
CDKN1A	-1.30893	0.00336697	-1.46704	0.00191785	-1.38799	Yes
GPNMB	-1.64274	0.00342678	-1.124	0.0413018	-1.38337	Yes
DDIT3	-1.30189	0.00443414	-1.43733	0.0040614	-1.36961	Yes
HIST1H2BD	-1.48741	0.00116811	-1.246	0.00602763	-1.36671
PCK2			-1.30002	0.00789658	-1.30002	Yes
HIST2H2AC	-1.2619	0.00828098			-1.2619
HIST1H2AC	-1.2401	0.00301393	-1.21968	0.00520749	-1.22989
IFRD1	-1.39673	9.0651e-05	-1.05601	0.00191785	-1.22637
CDH26	-1.22295	0.00437309			-1.22295	Yes
MAP1B	-1.30164	0.0130925	-1.12583	0.0395179	-1.21373	Yes
MAF			-1.17984	0.0325528	-1.17984	Yes
ANKRD29	-1.16686	0.0450122			-1.16686
TNFSF4	-1.27596	0.00438056	-1.05425	0.0195489	-1.1651
NAP1L1	-1.1426	0.00751898			-1.1426
PSAT1			-1.12926	0.00938944	-1.12926	Yes
HIST1H4H	-1.12755	0.0342928			-1.12755
LASP1	-1.08949	0.0356377			-1.08949	Yes
FAM198B	-1.08286	0.02275			-1.08286
CAPN13	-1.07271	0.0160712			-1.07271	Yes
PRKD1	-1.06475	0.00979915			-1.06475	Yes
MOCOS			-1.02456	0.047714	-1.02456
RDH11	-0.974987	0.000589488	-1.02956	0.000686749	-1.00227	Yes
ASNS			-0.983822	0.0352253	-0.983822	Yes
LONP1			-0.976399	0.00820101	-0.976399	Yes
TMEM2	-0.971609	0.0255778			-0.971609
NUPR1	-1.05927	0.00382286	-0.869393	0.0182355	-0.964333	Yes
CHTF18	-0.955187	0.0392553			-0.955187
MYL5	-1.00856	0.0131571	-0.894127	0.035654	-0.951343
EMC6	-1.03832	1.32167e-06	-0.848807	1.82775e-05	-0.943562	Yes
TMEM5	-0.933404	0.0218716			-0.933404
FKBP11			-0.90697	0.0182355	-0.90697	Yes
FAM217B	-0.90052	0.0270265			-0.90052	Yes
SSH3	-0.886616	0.0382972			-0.886616
KRCC1	-0.922611	0.0024263	-0.846637	0.00602763	-0.884624	Yes
FOLH1	-0.883169	0.00382286			-0.883169	Yes
ADM2	-0.705985	0.0392553	-1.0242	0.00764846	-0.865092	Yes
LPAR3	-0.836658	0.0119804	-0.888547	0.012255	-0.862603	Yes
LAMA1	-0.854438	0.0435279			-0.854438	Yes
BEST1	-0.697029	0.024039	-1.00953	0.00452345	-0.853279	Yes
FAM214A	-0.844484	0.0191949			-0.844484
MKNK2	-0.785365	0.00553166	-0.891586	0.00414374	-0.838476
MAPK10	-0.866326	0.0232159	-0.804926	0.0471058	-0.835626	Yes
BIK	-0.834089	0.0273496			-0.834089
CUX1			-0.828541	0.00602763	-0.828541
MIR22HG	-0.706455	0.0342928	-0.930893	0.0106164	-0.818674
HSDL2	-0.808621	0.00684658			-0.808621	Yes
RGS1	-0.807685	0.0357986			-0.807685
IGFBP5	-0.806347	0.0406317			-0.806347	Yes
GADD45A			-0.805615	0.0272291	-0.805615	Yes
AK1	-0.803296	0.0380232			-0.803296	Yes
RPS27L	-0.811872	0.0128391	-0.78939	0.0217365	-0.800631
SWI5	-0.797967	0.00550161			-0.797967
RAB24	-0.881929	0.00342678	-0.712406	0.0176673	-0.797168
ENSA	-0.795557	0.0103415			-0.795557	Yes
ZW10	-0.624599	0.00878753	-0.953871	0.000772707	-0.789235
TP53TG1	-0.839816	0.00183216	-0.736561	0.00636665	-0.788188	Yes
TUFT1			-0.78333	0.0169343	-0.78333	Yes
C15orf57	-0.560526	0.0198585	-1.00543	0.000690452	-0.78298
CDC14A	-0.780145	0.0222835			-0.780145	Yes
YBEY	-0.771277	0.00509012			-0.771277
HIST1H2BK	-0.757652	0.0128391	-0.77855	0.0156039	-0.768101
CAPRIN2	-0.757068	0.0439773			-0.757068	Yes
RTCA	-0.75314	0.0272747			-0.75314
GPD1L	-0.827808	0.00131436	-0.667878	0.00764846	-0.747843
LOC92249	-0.69834	0.00291475	-0.794811	0.00163118	-0.746576
SESN3	-0.745714	0.00975184			-0.745714	Yes
SNORA38B	-0.743166	0.0354233			-0.743166
PNRC2	-0.742349	0.0383158			-0.742349
RPL26L1	-0.856709	5.20308e-06	-0.627496	0.000455333	-0.742103
LGMN	-0.782117	0.0183805	-0.69317	0.0471058	-0.737644
PABPC1	-0.737477	0.032307			-0.737477
PPAPDC1B	-0.794011	0.00741387	-0.679442	0.0269002	-0.736726
BMI1	-0.766319	0.00342678	-0.705212	0.00789658	-0.735766
TOR1AIP1	-0.731215	0.0199658			-0.731215	Yes
KCNK1	-0.725571	0.0220039			-0.725571
STX19	-0.724734	0.0183805			-0.724734
CLIC4			-0.722395	0.0198346	-0.722395	Yes
ARL5A	-0.717465	0.0183805			-0.717465
RAC1	-0.72354	0.00383276	-0.702836	0.00711286	-0.713188
ZNF721	-0.784456	0.00572002	-0.63201	0.0289023	-0.708233
TAGLN	-0.703613	0.0258545			-0.703613
IL36RN	-0.701313	0.0499767			-0.701313
ATF4	-0.674357	0.00590974	-0.725385	0.00602763	-0.699871	Yes
ANKRD22	-0.697637	0.039327			-0.697637
USMG5	-0.694937	0.00318205			-0.694937
GARS			-0.694804	0.02786	-0.694804
TMEM175	-0.629629	0.00382286	-0.759667	0.00163118	-0.694648
C14orf93	-0.709469	0.0160712	-0.675932	0.0293168	-0.6927	Yes
EFCAB4A	-0.688853	0.0475148			-0.688853
MAGED1			-0.687113	0.00602763	-0.687113	Yes
SLC33A1	-0.499939	0.0343412	-0.873287	0.00169876	-0.686613	Yes
VPS25	-0.684436	0.00991113			-0.684436
INPP4B	-0.724545	0.00849665	-0.638356	0.0267426	-0.68145	Yes
ASCL2	-0.679588	0.0404936			-0.679588
PHACTR2	-0.679495	0.0225806			-0.679495
ATPIF1	-0.678093	0.0084215			-0.678093
FAM188A	-0.675948	0.0285351			-0.675948
ZDHHC16	-0.752909	0.00775504	-0.596175	0.0396175	-0.674542
ZCWPW1	-0.67037	0.0183805			-0.67037
MAP1LC3B			-0.661273	0.00877687	-0.661273	Yes
FCGBP	-0.65591	0.0144953			-0.65591
STAMBPL1	-0.654544	0.0187061			-0.654544
GSTA4	-0.65215	0.0463635			-0.65215	Yes
NOLC1			-0.651404	0.0276767	-0.651404	Yes
STX12	-0.650639	0.00536728			-0.650639
HOGA1	-0.556705	0.00587296	-0.743827	0.00135669	-0.650266
SERF2	-0.752955	0.00350625	-0.546771	0.0325528	-0.649863	Yes
TMCO3	-0.574823	0.0144953	-0.71689	0.00602763	-0.645857	Yes
TBC1D9	-0.645841	0.00183216			-0.645841	Yes
CCDC53	-0.64171	0.0450122			-0.64171
UBE3A	-0.641498	0.0447641			-0.641498
BSDC1			-0.638054	0.00298538	-0.638054	Yes
GANAB	-0.724839	0.00741387	-0.548558	0.0484045	-0.636699	Yes
ITGB1BP1	-0.634313	0.0309299			-0.634313	Yes
CMTM6			-0.630845	0.0490287	-0.630845
KIAA1598	-0.630546	0.0342928			-0.630546
HOPX	-0.517963	0.030287	-0.739014	0.00602763	-0.628489
ZNF302	-0.627829	0.0357986			-0.627829
XPC			-0.627591	0.0217365	-0.627591	Yes
RWDD2A	-0.626685	0.0285351			-0.626685
ACYP2	-0.714157	0.005824	-0.531851	0.0432592	-0.623004
OSBPL5	-0.622586	0.0197639			-0.622586
LINC00478	-0.619651	0.00537191	-0.624856	0.00764846	-0.622253
THNSL2			-0.6221	0.0395259	-0.6221	Yes
IDNK	-0.688835	0.00497711	-0.552346	0.0269002	-0.620591	Yes
TP53TG3	-0.619358	0.0264247			-0.619358
C2CD2	-0.693831	0.00342678	-0.543488	0.0207377	-0.61866
ALDH3A2	-0.599335	0.0419648	-0.629768	0.0478169	-0.614551	Yes
PPCS	-0.613327	0.00422636			-0.613327
ZDHHC14	-0.606312	0.0342928			-0.606312	Yes
TBC1D9B	-0.603449	0.0128348			-0.603449
TANC1	-0.603007	0.024539			-0.603007
SMIM4	-0.60281	0.015926			-0.60281
NPTN	-0.599927	0.0140089			-0.599927	Yes
LYRM5	-0.599158	0.029961			-0.599158
IER3IP1	-0.594265	0.00849665			-0.594265	Yes
SLC7A8	-0.590782	0.0482813			-0.590782	Yes
C7orf55	-0.601332	0.00917202	-0.573786	0.0457078	-0.587559
RAB23	-0.609324	0.0107931	-0.557188	0.0271105	-0.583256
PPAP2B			-0.582699	0.0384961	-0.582699
ERLIN2	-0.579306	0.044882			-0.579306	Yes
ATM	-0.576373	0.0464017			-0.576373	Yes
TMEM135	-0.569924	0.00835743			-0.569924	Yes
IMMP2L	-0.569135	0.0187061			-0.569135
BRPF3			-0.568717	0.0071318	-0.568717
LYRM1	-0.568632	0.0306503			-0.568632
INTS3	-0.566296	0.0233365			-0.566296	Yes
SNORA61	-0.581691	0.00287783	-0.543931	0.00602763	-0.562811
WDR1	-0.562274	0.0144955			-0.562274	Yes
MLLT11	-0.561016	0.00936013			-0.561016
ANKRD13A	-0.599224	0.0084215	-0.519253	0.0276767	-0.559239	Yes
IGF2R	-0.507544	0.0229	-0.610681	0.0114985	-0.559112
RPL26P30	-0.649776	0.0011296	-0.463937	0.0126727	-0.556856
MYPOP	-0.519793	0.0197639	-0.591109	0.0129855	-0.555451
CBS	-0.482937	0.0183805	-0.627083	0.00602763	-0.55501
IGIP	-0.553272	0.0187752			-0.553272
ATP9A	-0.594984	0.00465706	-0.510098	0.0168775	-0.552541	Yes
TOMM22	-0.552291	0.00536728			-0.552291
XPR1	-0.549953	0.0342928			-0.549953
PDSS2	-0.549159	0.0198375			-0.549159
SPOP			-0.549064	0.0198346	-0.549064
COQ2	-0.547676	0.0287652	-0.54914	0.0394798	-0.548408
RAPGEF1	-0.546164	0.0187752			-0.546164	Yes
LARP6			-0.543654	0.0397725	-0.543654	Yes
ACO2	-0.604986	0.00350625	-0.481604	0.0198346	-0.543295
MSL3	-0.543126	0.0220039			-0.543126
RPS6KA5	-0.542234	0.0286415			-0.542234
ZNF621	-0.537969	0.0119804			-0.537969
C14orf142	-0.537298	0.0131571			-0.537298
RBM5			-0.535547	0.00877687	-0.535547	Yes
BCL2L1	-0.535088	0.0276552			-0.535088	Yes
CTTN	-0.613484	0.00282992	-0.454666	0.037623	-0.534075	Yes
PDXDC1			-0.533849	0.0275015	-0.533849	Yes
ATG7	-0.530001	0.0390248			-0.530001	Yes
FKBP3	-0.529162	0.0419598			-0.529162	Yes
MR1			-0.527967	0.0330365	-0.527967
COG6	-0.475165	0.0205361	-0.569479	0.0101858	-0.522322	Yes
UPK3BL			-0.522006	0.0133902	-0.522006
ASCC2	-0.520817	0.0233365			-0.520817
NFX1	-0.519064	0.00751898			-0.519064	Yes
CCDC90B	-0.517731	0.038271			-0.517731	Yes
JMJD7-PLA2G4B	-0.516707	0.0455164			-0.516707
CD151	-0.515934	0.0350286			-0.515934	Yes
VIMP	-0.468835	0.0187752	-0.560792	0.00938944	-0.514814
CAMLG	-0.500747	0.0178527	-0.521401	0.0198346	-0.511074
UQCRC2	-0.510566	0.0224807			-0.510566
POLD4	-0.509945	0.0198585			-0.509945
STK19			-0.507881	0.0293168	-0.507881
ENC1	-0.505786	0.0370397			-0.505786	Yes
RBL2			-0.505237	0.014879	-0.505237	Yes
GRB14	-0.505198	0.021491			-0.505198	Yes
RNF144A	-0.595878	0.00119599	-0.411426	0.0175109	-0.503652	Yes
PPP1R7	-0.503291	0.0248188			-0.503291
GXYLT1	-0.503077	0.0251544			-0.503077
ANAPC16	-0.502512	0.00350056			-0.502512
IFT27	-0.499052	0.0328571	-0.504113	0.0433883	-0.501582
AKIRIN1	-0.42491	0.00828098	-0.576793	0.00163118	-0.500851
POLR1D	-0.495888	0.00301393	-0.503336	0.00414374	-0.499612
UQCR10	-0.499371	0.00891392			-0.499371
PLEKHH3	-0.454763	0.00999564	-0.542046	0.00602763	-0.498405	Yes
RIT2	-0.497541	0.0335349			-0.497541
LINGO4	-0.498425	0.0276159	-0.496336	0.0394798	-0.49738
HIST1H2BC	-0.4698	0.0109101	-0.522214	0.00877687	-0.496007
KLF6	-0.504871	0.0269082	-0.486731	0.0453574	-0.495801	Yes
HIGD1A	-0.495798	0.0187752			-0.495798	Yes
GSDMB			-0.493543	0.0295834	-0.493543	Yes
CYB5D2	-0.49304	0.0255778			-0.49304	Yes
LRPAP1	-0.472464	0.00587296	-0.504545	0.00602763	-0.488505	Yes
SIPA1L2	-0.477599	0.0049331	-0.496432	0.00602763	-0.487015	Yes
ARHGAP21	-0.485899	0.0285681			-0.485899
CCNH	-0.485781	0.0196198			-0.485781
MYL12A	-0.484973	0.0342928			-0.484973	Yes
LAMA5	-0.449151	0.0273496	-0.516923	0.018252	-0.483037
HIST1H2BJ	-0.482111	0.0354687			-0.482111
SLC39A11			-0.479923	0.0412274	-0.479923
SOD2	-0.477415	0.0287652			-0.477415
FAM149B1	-0.476113	0.0464017			-0.476113
AKT1	-0.475959	0.0339749			-0.475959	Yes
RAB3IP	-0.451677	0.00342678	-0.497515	0.00263835	-0.474596
NDUFAF6	-0.472009	0.0294961			-0.472009	Yes
MCOLN2	-0.469794	0.0449293			-0.469794	Yes
PHYH	-0.468355	0.0439361			-0.468355
RBM3	-0.46779	0.0393255			-0.46779
HABP4	-0.43998	0.00156456	-0.491634	0.000849592	-0.465807
FNBP1	-0.48991	0.00463302	-0.43751	0.0126727	-0.46371
IMPA1			-0.461801	0.0391027	-0.461801
BUD31	-0.46071	0.0105024			-0.46071
NFE2L1			-0.460616	0.0289495	-0.460616
OGFR	-0.438805	0.0187061	-0.482398	0.0151114	-0.460602
EIF2B2	-0.458589	0.0166409			-0.458589	Yes
YIPF3			-0.457968	0.0487528	-0.457968
C5orf54	-0.46702	0.00485285	-0.44685	0.00902099	-0.456935
MCCC1	-0.44594	0.03452	-0.467521	0.0389526	-0.45673
SIRT5	-0.455431	0.0436725			-0.455431
DENND5A	-0.395355	0.0120213	-0.510386	0.00420613	-0.452871
ADAM15			-0.45283	0.0289495	-0.45283
ARHGAP32	-0.554068	0.00116811	-0.348955	0.0276683	-0.451511	Yes
SLC25A4	-0.485094	0.00563653	-0.417248	0.0198346	-0.451171	Yes
NDUFA4	-0.4501	0.00443414			-0.4501
FAM114A1			-0.449803	0.0127678	-0.449803
BRK1	-0.493029	0.00760325	-0.405569	0.0332371	-0.449299
CASP7	-0.44782	0.0145018			-0.44782	Yes
SMARCE1	-0.447099	0.044588			-0.447099
CIAO1	-0.446626	0.0342928			-0.446626
ZSCAN5A	-0.446513	0.00945223			-0.446513
KRT10	-0.446283	0.0266247			-0.446283
ZC3H7A	-0.387276	0.0389506	-0.504681	0.0133752	-0.445978
MYLIP	-0.444312	0.047034			-0.444312	Yes
NIPSNAP3A	-0.443441	0.0183805			-0.443441	Yes
AGA	-0.390207	0.0272747	-0.493323	0.0102732	-0.441765
LMO4			-0.439915	0.0329826	-0.439915	Yes
COG2	-0.460129	0.00382286	-0.419485	0.00941335	-0.439807
MIDN			-0.439793	0.0178489	-0.439793
C4orf33	-0.437592	0.032584			-0.437592	Yes
FAM71E1	-0.437531	0.0130925			-0.437531
RIT1	-0.430025	0.0138946	-0.443648	0.0163776	-0.436836
ILF3-AS1	-0.433134	0.0218716			-0.433134
FAM32A	-0.432413	0.0268565			-0.432413
SLC30A1			-0.430775	0.0457078	-0.430775	Yes
VPREB3	-0.430109	0.0386272			-0.430109
GMPR2	-0.42958	0.0365085			-0.42958
AUTS2	-0.426712	0.0426965			-0.426712	Yes
UNC93A			-0.426409	0.0276683	-0.426409
OSBPL2	-0.425741	0.0354687			-0.425741
RPL34	-0.402374	0.044588	-0.446193	0.0389806	-0.424283
ANKRD24	-0.422988	0.00979915			-0.422988
CRY1	-0.35848	0.0399569	-0.479972	0.0122659	-0.419226
H1F0	-0.381054	0.0147431	-0.457397	0.00752857	-0.419225
ARL16	-0.418249	0.0416406			-0.418249
DIABLO	-0.416044	0.0199391			-0.416044
FASTKD1	-0.416039	0.015564			-0.416039
ENPP5	-0.416026	0.0304392			-0.416026	Yes
ZNF426			-0.415765	0.0420041	-0.415765
CYB561	-0.415132	0.0475148			-0.415132	Yes
ZBTB8OS	-0.412769	0.0230385			-0.412769	Yes
F11R			-0.411345	0.0334858	-0.411345
LOC550643	-0.374619	0.0435279	-0.444387	0.0275015	-0.409503
UQCC1	-0.386783	0.0356377	-0.429243	0.030202	-0.408013
EXD2	-0.407979	0.0187061			-0.407979
BBS2	-0.405016	0.033058			-0.405016	Yes
AKAP13	-0.451101	0.0058063	-0.355405	0.0330365	-0.403253
PGAP3	-0.402728	0.0438371			-0.402728
HECTD4	-0.400717	0.0461743			-0.400717
C8orf4	-0.399521	0.0357986			-0.399521
RABL2B	-0.394914	0.00509012			-0.394914
ERBB3	-0.468744	0.00291475	-0.320229	0.0350566	-0.394486
NAPB	-0.390563	0.0294961			-0.390563
LINC00667	-0.389959	0.0488622			-0.389959
PAPSS1	-0.386282	0.0420572			-0.386282
LINC01184	-0.386163	0.00358048			-0.386163
FGF13	-0.430144	0.00342678	-0.338253	0.0198346	-0.384198	Yes
PELI1	-0.384109	0.0311818			-0.384109
PPP3CB	-0.37998	0.0367456			-0.37998
FAM210B	-0.379858	0.0355954			-0.379858	Yes
UGP2	-0.378991	0.033733			-0.378991
TRAPPC6B	-0.377555	0.0150073			-0.377555
SESN2			-0.376101	0.011697	-0.376101	Yes
GOLGA3			-0.375941	0.0378614	-0.375941	Yes
CYB561D2	-0.375433	0.0380232			-0.375433
HIST1H2AE	-0.374452	0.0473966			-0.374452
CATSPER2P1	-0.373366	0.0237589	-0.371446	0.0349227	-0.372406
CNPY2			-0.368311	0.0394798	-0.368311	Yes
SMDT1	-0.366454	0.0365085			-0.366454
BICD1	-0.365229	0.0435279			-0.365229	Yes
BCL2L2	-0.42075	0.00485285	-0.308284	0.0394798	-0.364517
PGBD3	-0.363631	0.0058063			-0.363631
TP53I3	-0.363086	0.0464017			-0.363086	Yes
BTBD7			-0.362962	0.0409574	-0.362962
JARID2	-0.362424	0.0406317			-0.362424	Yes
ZBTB4	-0.36099	0.0285073			-0.36099
GLE1	-0.360888	0.0439773			-0.360888
COL5A2	-0.358746	0.0303677			-0.358746	Yes
KIAA0247	-0.354824	0.0143949			-0.354824
PRMT2	-0.335452	0.0474897	-0.372836	0.0402224	-0.354144
FEZ2	-0.354117	0.0197639			-0.354117
ZNF17	-0.358943	0.0128348	-0.347845	0.0219749	-0.353394
LRRC36	-0.3525	0.0275066			-0.3525
HIST1H2BG	-0.349804	0.00654787			-0.349804
USP42	-0.339951	0.0310084	-0.356437	0.0349227	-0.348194	Yes
MTL5	-0.347886	0.0198375			-0.347886
LRRC57	-0.331632	0.0382972	-0.363853	0.035138	-0.347743
C9orf169	-0.34147	0.0444311			-0.34147
B4GALT4			-0.341321	0.0489475	-0.341321
PHF21A	-0.393019	0.00342678	-0.287348	0.0295834	-0.340184	Yes
DICER1-AS1	-0.339706	0.0382972			-0.339706
PIGP	-0.360613	0.0482813	-0.316494	0.0396175	-0.338554
ATP5S	-0.404685	0.0369415	-0.270648	0.0188556	-0.337667
IVNS1ABP	-0.337537	0.0340149			-0.337537	Yes
INPPL1	-0.294697	0.022239	-0.376184	0.00789658	-0.335441	Yes
RDH5	-0.335219	0.0288371			-0.335219
PCED1A	-0.334825	0.0447641			-0.334825
GPN2	-0.334312	0.0273496			-0.334312
UBE2E1	-0.332461	0.0447641			-0.332461	Yes
ZNF616	-0.299029	0.0121736	-0.361506	0.00602763	-0.330267
ENOX2	-0.333467	0.0294961	-0.321873	0.049765	-0.32767
NMNAT1	-0.372562	0.00183216	-0.281989	0.0147512	-0.327275
MST1			-0.326847	0.00602763	-0.326847
TTC25	-0.326618	0.0344493			-0.326618
BCKDHB	-0.326534	0.0493324			-0.326534
GRAMD4			-0.325656	0.048623	-0.325656	Yes
GPRASP2	-0.278207	0.0369415	-0.369562	0.0116428	-0.323884
CTSO	-0.323471	0.0369084			-0.323471	Yes
IL1F10	-0.32315	0.0394407			-0.32315
LIMK2	-0.322009	0.0222075			-0.322009
PRKCA	-0.326578	0.0234103	-0.31567	0.0391027	-0.321124	Yes
CPXM2			-0.320647	0.0424154	-0.320647
TSC1	-0.341533	0.0154552	-0.294343	0.0470016	-0.317938	Yes
CCDC23	-0.315142	0.024039			-0.315142
POFUT2			-0.31441	0.00893011	-0.31441
SYAP1	-0.314211	0.0108996			-0.314211
PPP2R1B	-0.334829	0.0123638	-0.286697	0.0396522	-0.310763
LSP1	-0.28356	0.0305105	-0.33425	0.0182355	-0.308905
IYD	-0.307658	0.0220091			-0.307658
TTLL6	-0.306835	0.0488622			-0.306835
PSMG3-AS1	-0.303341	0.0342928			-0.303341
DNAJA2	-0.302756	0.0344595			-0.302756
ITLN2			-0.300212	0.0437178	-0.300212
MAP2	-0.328155	0.00835743	-0.270454	0.035138	-0.299304	Yes
UBE4A	-0.298554	0.0357986			-0.298554
AKTIP	-0.295821	0.0408462			-0.295821	Yes
YIPF5	-0.308282	0.00878753	-0.27423	0.0264464	-0.291256
S100A13	-0.290283	0.0198375			-0.290283
TBC1D24			-0.289873	0.0271105	-0.289873	Yes
PIK3R1	-0.288181	0.0447641			-0.288181	Yes
ITPA	-0.287264	0.0370141			-0.287264
NEK11	-0.286506	0.0269082	-0.283629	0.0393392	-0.285067
CTSZ	-0.284595	0.0294961			-0.284595
INCA1	-0.284313	0.0406317			-0.284313
POLR2D	-0.276489	0.0382972	-0.283072	0.0495199	-0.279781	Yes
RALGAPB	-0.277747	0.0196272			-0.277747
FMO4	-0.260594	0.0464017	-0.292819	0.0381364	-0.276706
INTS7	-0.274736	0.0342928			-0.274736
ABHD5	-0.274534	0.0307153			-0.274534
C22orf46	-0.273069	0.0339749			-0.273069
PVRL4	-0.273053	0.048741			-0.273053
ATP8A1	-0.270943	0.0171921			-0.270943	Yes
CASP4	-0.268616	0.0382972			-0.268616	Yes
ALK	-0.266302	0.0329253			-0.266302
TMEM91	-0.26424	0.0369415			-0.26424
RAPGEF3	-0.260199	0.0471729			-0.260199
ARAP2	-0.257468	0.0386272			-0.257468	Yes
CREBL2	-0.257299	0.0303677			-0.257299
CNNM2			-0.254182	0.0358807	-0.254182	Yes
DNAJB12	-0.260139	0.024039	-0.247937	0.0432592	-0.254038	Yes
TPT1	-0.253945	0.0237589			-0.253945	Yes
MYO5A	-0.252232	0.0399569			-0.252232	Yes
BACE2	-0.24575	0.0178527			-0.24575
GAA	-0.24132	0.0499767			-0.24132
LOC155060	-0.237339	0.0464879			-0.237339	Yes
SMIM11	-0.237276	0.0488582			-0.237276
CNOT8	-0.232902	0.0357986			-0.232902
TTLL3	-0.235682	0.0238929	-0.225635	0.041615	-0.230658
ENDOV	-0.230399	0.0354233			-0.230399	Yes
KIAA0922	-0.229331	0.0390248			-0.229331
FOSB	-0.228506	0.026448			-0.228506
SNORA38	-0.222671	0.0435279			-0.222671
NOS3	-0.221315	0.0380917			-0.221315	Yes
C18orf32	-0.214777	0.0394472			-0.214777

## Sheet: S3. Down-regulated genes
Supplementary Table 3: Genes significantly down-regulated by KMT5A knockdown
* GSE211638
KMT5A siRNA	#1		#2		n=310	n=89*										KMT5A siRNA	#1		#2		n=310	n=89*
	logfc	adj. p-value	logfc	adj. p-value	mean logfc	AR regulated											logfc	adj. p-value	logfc	adj. p-value	mean logfc	AR regulated
KRT18P55	1.92436	0.00041269	1.22156	0.0127678	1.57296											KRT18P55	1.92436	4.13 x 10-4	1.22156	1.28 x 10-2	1.57296
SNORD16	1.53632	2.01905e-06	1.51928	4.00862e-06	1.5278											SNORD16	1.53632	2.02 x 10-6	1.51928	4.01 x 10-6	1.5278
KRT8	1.77899	0.000204953	1.27414	0.00525194	1.52656	Yes										KRT8	1.77899	2.05 x 10-4	1.27414	5.25 x 10-3	1.52656	Yes
FAM189B	1.48401	0.0303677			1.48401											FAM189B	1.48401	3.04 x 10-2			1.48401
SPDEF	1.41227	0.0158542			1.41227	Yes										SPDEF	1.41227	1.59 x 10-2			1.41227	Yes
CDC20	1.5464	0.00497711	1.10288	0.0471058	1.32464											CDC20	1.5464	4.98 x 10-3	1.10288	4.71 x 10-2	1.32464
IMPDH1	1.29203	0.0262322			1.29203	Yes										IMPDH1	1.29203	2.62 x 10-2			1.29203	Yes
PAQR4	1.42016	0.000793611	1.086	0.00737405	1.25308	Yes										PAQR4	1.42016	7.94 x 10-4	1.086	7.37 x 10-3	1.25308	Yes
ATP5C1	1.23021	0.0197639			1.23021											ATP5C1	1.23021	1.98 x 10-2			1.23021
PLEKHF1	1.31515	0.00156456	1.00525	0.0116488	1.1602											PLEKHF1	1.31515	1.56 x 10-3	1.00525	1.16 x 10-2	1.1602
AK4	1.15057	0.0151841			1.15057	Yes										AK4	1.15057	1.52 x 10-2			1.15057	Yes
KRT18	1.28068	0.000126644	1.01824	0.00163118	1.14946	Yes										KRT18	1.28068	1.27 x 10-4	1.01824	1.63 x 10-3	1.14946	Yes
ANKRD37	1.13661	0.0294961			1.13661	Yes										ANKRD37	1.13661	2.95 x 10-2			1.13661	Yes
SPRYD4	1.12055	0.0381998			1.12055											SPRYD4	1.12055	3.82 x 10-2			1.12055
RAP1GAP			1.11732	0.0295834	1.11732	Yes										RAP1GAP			1.11732	2.96 x 10-2	1.11732	Yes
SETD8	1.16781	1.60519e-07	1.05216	8.72706e-07	1.10999											KMT5A	1.17	1.61 x 10-7	1.05	8.73 x 10-7	1.11
KIF22	1.09087	0.0144953			1.09087	Yes
TMEM109	1.08726	0.00828098			1.08726	Yes
RAB4A	1.03162	0.0107931			1.03162
PREP	1.0282	0.00828098			1.0282	Yes
SLC26A6	1.02706	0.00641268			1.02706	Yes
AGAP3	1.02321	0.00287651			1.02321
SND1	1.02256	0.0275066			1.02256	Yes
SPNS1	1.01692	0.0153165			1.01692
C9orf114	0.976184	0.0103415			0.976184
FARSA	0.967272	0.0203639			0.967272	Yes
CCDC86	0.876428	0.0107931	1.00979	0.00726329	0.94311	Yes
HSD11B2			0.929363	0.0457078	0.929363
SHPK	0.922239	0.0218406			0.922239
B3GNT1	0.907222	0.038271			0.907222
TUBA3E	0.896248			0.0334858	0.896248
CCDC58	0.891612			0.0209105	0.891612
ATAD2	0.879504	0.0435999			0.879504	Yes
AMD1	0.854319	0.00751898			0.854319
SPATA5L1	0.932326	0.00878753	0.775786	0.0352471	0.854056
F2RL1	0.846832	0.0382972			0.846832	Yes
CSRP1	0.835706	0.0216948	0.805965	0.0358323	0.820835
CXXC1	0.816663	0.0359989			0.816663
BCL2L12	0.795918	0.0255778			0.795918
CHKA	0.793286	0.0365085			0.793286	Yes
TIMM17B	0.874319	0.00751898	0.708093	0.035138	0.791206	Yes
GSTO1	0.808674	0.0175126	0.767017	0.0325356	0.787846
SLC35F2	0.785945	0.0232204			0.785945	Yes
CAP2	0.748419	0.00660266	0.821721	0.00602763	0.78507	Yes
NOA1	0.778249	0.0237589			0.778249
RHOB	0.787747	0.00701605	0.752864	0.0127678	0.770305	Yes
ODC1	0.770262	0.039178			0.770262	Yes
WDYHV1	0.819298	0.00301393	0.716721	0.0176417	0.76801
NET1			0.763556	0.035138	0.763556
CKS2	0.763129	0.0241357			0.763129
LOC81691	0.824348	0.00645363	0.701897	0.0240114	0.763123
TMSB15A	0.767752	0.015533	0.733159	0.0280635	0.750455	Yes
GCHFR	0.74763	0.0119395			0.74763
ERBB3	0.747193	0.0087122			0.747193
PPAP2A	0.776051	0.00167059	0.706752	0.00498342	0.741401
ATP6V0E2	0.734399	0.00741387			0.734399
KPNA2	0.685027	0.00301393	0.778836	0.00163118	0.731932
ADCK3	0.718447	0.0487449			0.718447
PTTG1	0.73761	0.0171921	0.693154	0.0330365	0.715382
CTNS	0.713798	0.0201224			0.713798
ASGR1	0.710674	0.00477678			0.710674
YIPF1	0.816872	0.00382286	0.592997	0.0228323	0.704934	Yes
ALG3	0.702316	0.0228036			0.702316
BLOC1S1	0.632697	0.0220039	0.77094	0.00977246	0.701818
CEBPA			0.695607	0.0267426	0.695607
BAG3	0.694199	0.00926202			0.694199	Yes
TMSB15B	0.685105	0.0294961	0.691827	0.0393392	0.688466
SARS2	0.686482	0.0118045			0.686482
TCEB1	0.610761	0.00891392	0.758011	0.00406405	0.684386
HDHD1			0.684263	0.00364159	0.684263
NREP	0.675452	0.0285014			0.675452
RPS7			0.668154	0.0338757	0.668154
DHCR7	0.659949	0.0464017			0.659949	Yes
PGAP2	0.653464	0.0301362			0.653464
MPC2	0.652815	0.0419648			0.652815	Yes
RNASET2			0.650407	0.0402224	0.650407
SLC2A1	0.644873	0.00293706			0.644873	Yes
AMFR	0.643501	0.0107931			0.643501
UBE2I	0.643399	0.0216835			0.643399
POLR1D	0.642034	0.0178527			0.642034
C1orf85	0.766001	0.000883224	0.51743	0.0156039	0.641715
RBPMS2	0.637272	0.0188239			0.637272	Yes
GEMIN8	0.636	0.0423843			0.636	Yes
VGF			0.635595	0.00938944	0.635595	Yes
NUDT1	0.541565	0.0391204	0.715069	0.0126727	0.628317
PHB			0.628039	0.0457078	0.628039
MRPL34	0.627856	0.0361838			0.627856	Yes
NMU	0.592379	0.0396216	0.654307	0.0352253	0.623343
UBE2L3	0.682491	0.00650064	0.559589	0.0290895	0.62104	Yes
PSMF1	0.746084	0.00252338	0.49063	0.0381364	0.618357
LPCAT3	0.617442	0.0144955			0.617442
GLUD1	0.615478	0.0232212			0.615478	Yes
TUBA3C	0.601385	0.039327	0.629282	0.0457078	0.615334
SLC8B1	0.613105	0.0149111			0.613105
SPHAR	0.687358	0.00696465	0.538741	0.0384961	0.61305
CREB3L4	0.603851	0.0392553			0.603851	Yes
CDC42EP2	0.63484	0.00466839	0.572491	0.0123976	0.603666
DNAJB1			0.594935	0.00443526	0.594935	Yes
SAPCD2	0.589884	0.0490249			0.589884	Yes
EXOSC7	0.621841	0.00917202	0.556828	0.0264639	0.589334
SNORD96A			0.588642	0.0394798	0.588642
PEA15	0.559186	0.0285351	0.615298	0.0256668	0.587242	Yes
RNFT2	0.536252	0.0224807	0.629982	0.0126727	0.583117
ARF1	0.572758	0.0255778			0.572758	Yes
PLK1	0.568729	0.0248916			0.568729
RALY	0.565364	0.0414048			0.565364	Yes
GCAT	0.564966	0.0334094			0.564966	Yes
PSMB2	0.563628	0.00849665			0.563628
TMEM160	0.527218	0.0342928	0.594535	0.0272291	0.560876
AGO2	0.558889	0.0489985			0.558889
HK2	0.554888	0.00999564			0.554888
RXRA	0.552544	0.02208			0.552544
KNSTRN	0.54957	0.0238186			0.54957	Yes
CIRBP-AS1			0.547927	0.0228201	0.547927
SIGMAR1	0.546432	0.0342928			0.546432
TYSND1	0.518226	0.0399569	0.571773	0.0357144	0.545
SLC43A1	0.576426	0.00183216	0.512675	0.00602763	0.544551	Yes
BAD	0.544127	0.0268565			0.544127
UBR7	0.542747	0.0103415			0.542747
PIGM	0.538773	0.0084215			0.538773
SNRPB	0.538553	0.039327			0.538553	Yes
HSPB11	0.584075	0.00318205	0.490309	0.012255	0.537192
ZSWIM1	0.515523	0.0112808	0.556158	0.0105132	0.535841
GCDH	0.533815	0.0421965			0.533815
DTD1	0.52706	0.0161123	0.532781	0.0216378	0.52992
PPP2R2D	0.526388	0.0222835			0.526388	Yes
COASY	0.526322	0.0382972			0.526322	Yes
EPN3	0.525991	0.00979915			0.525991
ABCG1	0.525982	0.0160712			0.525982
ZNF239	0.525336	0.0275109			0.525336
NOP16	0.524342			0.0454881	0.524342
RDH13	0.524016			0.0240354	0.524016
PRR14	0.523439	0.0495902			0.523439
PTPRA	0.522062	0.0419688			0.522062
NR2F6	0.537402	0.00497711	0.501647	0.0106164	0.519525	Yes
H2AFX	0.517888	0.0102931			0.517888
GALT			0.516493	0.0272291	0.516493
ARAF	0.51445	0.0178527			0.51445	Yes
PIK3CD	0.510588	0.0344595			0.510588
RAP1GDS1	0.503998	0.00509012			0.503998
IDH3B			0.503786	0.03829	0.503786
E2F6	0.503163	0.00741387			0.503163
SNAI2	0.501226	0.0349358			0.501226	Yes
RRS1			0.499227	0.0349227	0.499227
PPP1R35	0.497365	0.0435648			0.497365	Yes
DPM3	0.483937	0.0356377	0.507683	0.0394798	0.49581	Yes
PTCD1	0.494724	0.0407496			0.494724
C1orf109	0.535784	0.00233289	0.453575	0.00877687	0.49468
POLR3K			0.492947	0.0195489	0.492947
STMN1	0.353299	0.0363357	0.629924	0.0232726	0.491611
SRRM2	0.491295	0.0103415			0.491295
ZNF706	0.487721	0.0344711			0.487721	Yes
CYB5R3	0.4852	0.0330846			0.4852	Yes
CCT2	0.484514			0.0140671	0.484514
EBP	0.48343			0.0479603	0.48343	Yes
OSCP1	0.483158	0.0399569			0.483158
MSX1	0.482616	0.0103415			0.482616	Yes
RPA3	0.477461			0.0352253	0.477461
NDUFA6	0.475938			0.0276683	0.475938	Yes
MGAT2	0.474283	0.0436725			0.474283	Yes
FAM127B	0.469186	0.0171921			0.469186
RRP9	0.467936			0.0334858	0.467936
HSPE1	0.467395			0.0299909	0.467395
NFYC	0.488292	0.0133492	0.443235	0.0106164	0.465764
OCIAD2	0.463278			0.0339226	0.463278
TATDN2	0.462159	0.0250021			0.462159
ILF3	0.460754	0.0228036			0.460754
SNRNP70	0.460506	0.0195624			0.460506	Yes
RNF114	0.459165	0.00509012			0.459165
FBXO21	0.456043	0.0199368			0.456043
WDR46	0.453703	0.0128391			0.453703
ASH2L	0.450629	0.0321706			0.450629
CTDSPL			0.450314	0.012255	0.450314
PDLIM7	0.455209	0.0241357	0.444988	0.0385496	0.450098
TROAP	0.44862	0.0321706			0.44862
GLRX2			0.447904	0.0276767	0.447904	Yes
EIF2B4	0.383019	0.0432426	0.503658	0.0148118	0.443338	Yes
EZR	0.533152	0.00758975	0.351794	0.0470016	0.442473	Yes
TP53RK	0.525758	0.00183216	0.359074	0.0269986	0.442416
NOTCH2NL	0.382962	0.00379581	0.498286	0.000805126	0.440624
NELFCD	0.446571	0.0073499	0.4343	0.012255	0.440436
METTL13	0.439954	0.0423462			0.439954
ARHGEF18	0.439477	0.0339749			0.439477
PRICKLE4	0.405819	0.0168099	0.471815	0.00941335	0.438817
ZGPAT	0.438583	0.00929466			0.438583
SAFB	0.437146	0.0270265			0.437146
TMEM147	0.43707	0.0487449			0.43707
MTFP1	0.416174	0.0149111	0.453718	0.0126727	0.434946	Yes
NME1-NME2			0.430857	0.034429	0.430857
CDC25A	0.42887	0.0292089			0.42887	Yes
PSPC1	0.428115	0.0187828			0.428115
C2orf44	0.425911	0.0342928			0.425911
NOL6			0.425268	0.0391535	0.425268
SLBP	0.406387	0.0342928	0.443764	0.0309299	0.425075
KDM1A	0.424688	0.0337713			0.424688
PSME3			0.424268	0.0256668	0.424268
PDIA5	0.424268	0.0494327			0.424268	Yes
TPRKB			0.416592	0.0276767	0.416592
CD97	0.395455	0.0272747	0.435428	0.0237249	0.415442
RPUSD3	0.432794	0.0104194	0.388348	0.0282229	0.410571
MAPRE1	0.410425	0.0283002			0.410425	Yes
DPH2	0.343122	0.0419598	0.477601	0.0101858	0.410362
RBM22	0.409441	0.0108581			0.409441
C17orf96	0.409137	0.0467723			0.409137
PDX1			0.409135	0.0264639	0.409135
ABCF1	0.389826	0.0272747	0.428048	0.0240354	0.408937
CCDC12	0.494421	0.00154358	0.318827	0.0294617	0.406624
CRKL	0.403989	0.0456923			0.403989
SNORD56	0.400514			0.0362314	0.400514
LRRC3DN	0.399967			0.0232726	0.399967
PAK4	0.398338	0.0325416			0.398338	Yes
NOP2	0.398153	0.0369415			0.398153
NOL3	0.396697	0.0354233			0.396697	Yes
POLA1	0.394153	0.0350286			0.394153
ILF2	0.393936	0.00951598			0.393936	Yes
TCP1	0.393581			0.0358323	0.393581	Yes
LSM3	0.392402			0.049765	0.392402
NDUFC1	0.390969			0.0443258	0.390969
NUBP1	0.390798			0.0237249	0.390798	Yes
TMEM138	0.389582	0.0144953	0.388706	0.020714	0.389144
NDUFC2	0.459576	0.00350625	0.315259	0.0418448	0.387418
HMOX2	0.386711	0.0058063			0.386711
CWF19L1	0.386689	0.0392553			0.386689
TRAFD1	0.386212	0.0113915			0.386212
FKBP1A	0.384418	0.00991113			0.384418
BOLA2	0.33773	0.0430648	0.42558	0.0192952	0.381655
IRX2	0.37742	0.00781746			0.37742
WDR5	0.376646	0.0414048			0.376646
TMEM60			0.374525	0.0391027	0.374525
NDUFS3	0.374222	0.0487449			0.374222
NCOA5	0.372591	0.00660059			0.372591
CNNM3	0.371424	0.0294961			0.371424
SOCS2	0.368503	0.0369043			0.368503	Yes
NDUFB6			0.366478	0.0389806	0.366478
THRSP	0.38198	0.0196026	0.348482	0.0432592	0.365231
ZDHHC7	0.362201	0.0464202			0.362201
POP7	0.36057	0.0369084			0.36057	Yes
TUT1	0.359942	0.0234103			0.359942	Yes
PIPSL			0.359051	0.00636665	0.359051
PCBP1	0.358872	0.039178			0.358872	Yes
SLC19A1			0.355782	0.013299	0.355782
RRAGA	0.355634	0.00741387			0.355634	Yes
EBNA1BP2			0.350004	0.0448319	0.350004
ITPRIP	0.339204	0.0175126	0.360311	0.00636665	0.349758
SRRT	0.349153	0.0399434			0.349153
UBQLN1	0.349109	0.0339749			0.349109
RNF10	0.346961	0.00909012			0.346961	Yes
ALG14	0.345156	0.0307153			0.345156	Yes
ELAC2	0.344439	0.0488367			0.344439
UTP14A	0.344089			0.0309299	0.344089
PQBP1	0.306201	0.0090934	0.381165	0.00406405	0.343683
SPG21	0.340296			0.00789658	0.340296	Yes
ZNF830	0.339721	0.0285351			0.339721
FAM89A	0.339457	0.0329253			0.339457
SRRM1	0.337425	0.0292089			0.337425
DPM2	0.3368			0.0138314	0.3368	Yes
RTFDC1	0.334841	0.0237589			0.334841
STOML2	0.330457	0.0367456			0.330457
ASXL1	0.328847	0.0107931			0.328847
XRN2	0.327478	0.0279237			0.327478
DLX1	0.297146	0.0350742	0.355073	0.0198346	0.326109	Yes
PARP12	0.324248	0.0365085			0.324248
MPZL1	0.323449	0.0220039			0.323449	Yes
MED25	0.321945	0.032584			0.321945
CSNK2A1	0.320002	0.0456143			0.320002
GAD1	0.319561	0.0414048			0.319561
FOXK1	0.31829	0.0441866			0.31829
CMC1	0.315115			0.0278393	0.315115
C17orf100	0.314326	0.029961			0.314326
PQLC3	0.314286	0.0307153			0.314286
DHRS2	0.313338	0.0394407			0.313338
IGF2BP1	0.311309	0.0294014			0.311309
SPATA2	0.308292	0.024039			0.308292	Yes
ZNF777	0.306846	0.0357986			0.306846
REXO1	0.305163	0.0426965			0.305163
IRS2	0.304039	0.0231548			0.304039	Yes
PTBP2	0.303858	0.0435279			0.303858
LYPLA2	0.300834			0.049765	0.300834	Yes
EPS15L1	0.302215	0.0222075	0.298147	0.0334858	0.300181
TRMU	0.308667	0.0145018	0.288393	0.0295834	0.29853
ITFG2	0.293462	0.00798169	0.302417	0.00941335	0.29794
ELMSAN1	0.295324			0.0475861	0.295324
ACVR1B	0.295122	0.0187061			0.295122
ARMCX6	0.302694	0.00852671	0.282263	0.0189358	0.292479
PCBP2	0.32218	0.00554152	0.261776	0.0273216	0.291978
CINP	0.291555			0.0309299	0.291555
NFX1	0.285983	0.0221655	0.292108	0.0278448	0.289046	Yes
TAF4	0.28709			0.0453253	0.28709
ZNF330	0.284463			0.0182355	0.284463
ACBD6	0.283644	0.0497513			0.283644
GAGE12I	0.282754			0.047714	0.282754
SYPL1	0.267193	0.0309107	0.296264	0.0269002	0.281728
C6orf57	0.280543			0.0341891	0.280543
TRIO	0.27483	0.0311566			0.27483
CHERP	0.272467	0.0497833			0.272467
SLC35D2	0.272455			0.0471058	0.272455
RNF213	0.26955			0.0470016	0.26955
CCT5	0.268514			0.0120024	0.268514
WDR20	0.26825	0.0287652			0.26825
MEN1	0.268063	0.0269082			0.268063	Yes
VCL	0.262714	0.0441334			0.262714	Yes
TRIM41	0.253794			0.0371853	0.253794
MYO19	0.25093	0.0495902			0.25093
ANKLE2	0.250494	0.024039			0.250494
THEM4	0.246446	0.00775504			0.246446
PRRC2B	0.240907	0.02208			0.240907
TP53I11	0.240191	0.0382972			0.240191	Yes
PPAPDC1A	0.232527	0.0341656			0.232527
UBE2V1	0.232174	0.0488622			0.232174
TGS1	0.224793	0.0361523			0.224793

## Sheet: S4. KEGG down-regulated
Supplementary Table 4. KEGG Pathways Down-regulated in response to KMT5A knockdown in the presence of DHT stimulation
Term	Count	%	PValue
hsa05010:Alzheimer disease	13	4.57746	0.0266604
hsa05020:Prion disease	12	4.22535	0.00587198
hsa05208:Chemical carcinogenesis - reactive oxygen species	10	3.52113	0.0122238
hsa04932:Non-alcoholic fatty liver disease	9	3.16901	0.00433584
hsa03040:Spliceosome	8	2.8169	0.0114198
hsa04910:Insulin signaling pathway	7	2.46479	0.0269652
hsa05211:Renal cell carcinoma	6	2.11268	0.00577115
hsa04012:ErbB signaling pathway	6	2.11268	0.0136403
hsa03008:Ribosome biogenesis in eukaryotes	6	2.11268	0.0354951
hsa04930:Type II diabetes mellitus	5	1.76056	0.00706281
hsa00510:N-Glycan biosynthesis	5	1.76056	0.00947074

## Sheet: S5. KEGG up-regulated
Supplementary Table 5. KEGG pathways Up-regulated in response to KMT5A knockdown in the presence of DHT stimulation
Term	Count	%	PValue
hsa04151:PI3K-Akt signaling pathway	16	4.43213	0.00452309
hsa05131:Shigellosis	13	3.60111	0.00372824
hsa04210:Apoptosis	12	3.3241	7.86086e-05
hsa05417:Lipid and atherosclerosis	12	3.3241	0.00367808
hsa04010:MAPK signaling pathway	12	3.3241	0.0324379
hsa05208:Chemical carcinogenesis - reactive oxygen species	11	3.04709	0.0134098
hsa04932:Non-alcoholic fatty liver disease	10	2.77008	0.00369526
hsa04510:Focal adhesion	10	2.77008	0.0187476
hsa05415:Diabetic cardiomyopathy	10	2.77008	0.0198593
hsa05166:Human T-cell leukemia virus 1 infection	10	2.77008	0.0329084
hsa04068:FoxO signaling pathway	9	2.49307	0.00451209
hsa04218:Cellular senescence	9	2.49307	0.0124819
hsa04722:Neurotrophin signaling pathway	8	2.21607	0.00944324
hsa04910:Insulin signaling pathway	8	2.21607	0.0193153
hsa01240:Biosynthesis of cofactors	8	2.21607	0.0327971
hsa04370:VEGF signaling pathway	7	1.93906	0.00106608
hsa04115:p53 signaling pathway	7	1.93906	0.00320626
hsa05212:Pancreatic cancer	7	1.93906	0.00392177
hsa04211:Longevity regulating pathway	7	1.93906	0.00844471
hsa05222:Small cell lung cancer	7	1.93906	0.0098722
hsa04666:Fc gamma R-mediated phagocytosis	7	1.93906	0.0126209
hsa05231:Choline metabolism in cancer	7	1.93906	0.0132292
hsa04670:Leukocyte transendothelial migration	7	1.93906	0.0259241
hsa04071:Sphingolipid signaling pathway	7	1.93906	0.0311401
hsa04110:Cell cycle	7	1.93906	0.0395294
hsa04728:Dopaminergic synapse	7	1.93906	0.0477669
hsa04664:Fc epsilon RI signaling pathway	6	1.66205	0.0111549
hsa05223:Non-small cell lung cancer	6	1.66205	0.0140574
hsa01524:Platinum drug resistance	6	1.66205	0.0148553
hsa04012:ErbB signaling pathway	6	1.66205	0.0268729
hsa05210:Colorectal cancer	6	1.66205	0.028089
hsa04933:AGE-RAGE signaling pathway in diabetic complications	6	1.66205	0.0488275
hsa05211:Renal cell carcinoma	5	1.38504	0.0481751
hsa05031:Amphetamine addiction	5	1.38504	0.0481751
hsa04215:Apoptosis - multiple species	4	1.10803	0.0251445

## Sheet: S6. BP down-regulated
Supplementary Table 6. Biological Processes Down-regulated in response to KMT5A knockdown in the presence of DHT stimulation
Term	Count	%	PValue
GO:0000122~negative regulation of transcription from RNA polymerase II promoter	23	8.09859	0.010694
GO:0051301~cell division	11	3.87324	0.0353258
GO:0006457~protein folding	9	3.16901	0.00183005
GO:0000398~mRNA splicing, via spliceosome	9	3.16901	0.00512886
GO:0006397~mRNA processing	9	3.16901	0.00766968
GO:0006364~rRNA processing	8	2.8169	0.0018363
GO:0042593~glucose homeostasis	6	2.11268	0.019678
GO:0007015~actin filament organization	6	2.11268	0.0401749
GO:0061077~chaperone-mediated protein folding	5	1.76056	0.00226308
GO:0006120~mitochondrial electron transport, NADH to ubiquinone	5	1.76056	0.00345897
GO:0032981~mitochondrial respiratory chain complex I assembly	5	1.76056	0.00999304
GO:0001558~regulation of cell growth	5	1.76056	0.022541
GO:0051568~histone H3-K4 methylation	4	1.40845	0.00405084
GO:0006506~GPI anchor biosynthetic process	4	1.40845	0.00568164
GO:0006401~RNA catabolic process	4	1.40845	0.0117424
GO:0035774~positive regulation of insulin secretion involved in cellular response to glucose stimulus	4	1.40845	0.0146925
GO:0097191~extrinsic apoptotic signaling pathway	4	1.40845	0.0204593
GO:0001541~ovarian follicle development	4	1.40845	0.0217413
GO:1901998~toxin transport	4	1.40845	0.0217413
GO:0022900~electron transport chain	4	1.40845	0.0480376
GO:1904851~positive regulation of establishment of protein localization to telomere	3	1.05634	0.00768486
GO:0051252~regulation of RNA metabolic process	3	1.05634	0.00768486
GO:1904871~positive regulation of protein localization to Cajal body	3	1.05634	0.00930901
GO:0010918~positive regulation of mitochondrial membrane potential	3	1.05634	0.0110715
GO:1904874~positive regulation of telomerase RNA localization to Cajal body	3	1.05634	0.0171492
GO:0072697~protein localization to cell cortex	2	0.704225	0.0269606
GO:0034140~negative regulation of toll-like receptor 3 signaling pathway	2	0.704225	0.0401682
GO:1990001~inhibition of cysteine-type endopeptidase activity involved in apoptotic process	2	0.704225	0.0401682

## Sheet: S7. BP up-regulated
Supplementary Table 7. Biological Processes Up-regulated in response to KMT5A knockdown in the presence of DHT stimulation
Term	Count	%	PValue
GO:0007165~signal transduction	36	9.9723	0.001317
GO:0006468~protein phosphorylation	15	4.15512	0.0494748
GO:0006508~proteolysis	14	3.87812	0.0365527
GO:0043065~positive regulation of apoptotic process	12	3.3241	0.0243364
GO:0042981~regulation of apoptotic process	11	3.04709	0.00431402
GO:0006886~intracellular protein transport	11	3.04709	0.0444427
GO:0042593~glucose homeostasis	7	1.93906	0.012807
GO:0006417~regulation of translation	6	1.66205	0.00920187
GO:0007265~Ras protein signal transduction	6	1.66205	0.0158638
GO:0010592~positive regulation of lamellipodium assembly	5	1.38504	0.00135058
GO:0001541~ovarian follicle development	5	1.38504	0.00633488
GO:0034198~cellular response to amino acid starvation	5	1.38504	0.00686232
GO:0051402~neuron apoptotic process	5	1.38504	0.00686232
GO:0008630~intrinsic apoptotic signaling pathway in response to DNA damage	5	1.38504	0.00800255
GO:0043525~positive regulation of neuron apoptotic process	5	1.38504	0.0184664
GO:0000045~autophagosome assembly	5	1.38504	0.0216963
GO:0042752~regulation of circadian rhythm	5	1.38504	0.0240295
GO:0010595~positive regulation of endothelial cell migration	5	1.38504	0.0265091
GO:0010977~negative regulation of neuron projection development	5	1.38504	0.0319129
GO:0032091~negative regulation of protein binding	5	1.38504	0.0379167
GO:0032868~response to insulin	5	1.38504	0.0411451
GO:0008637~apoptotic mitochondrial changes	4	1.10803	0.00225942
GO:2001243~negative regulation of intrinsic apoptotic signaling pathway	4	1.10803	0.0113881
GO:0097192~extrinsic apoptotic signaling pathway in absence of ligand	4	1.10803	0.0125463
GO:0097193~intrinsic apoptotic signaling pathway	4	1.10803	0.0137695
GO:0071480~cellular response to gamma radiation	4	1.10803	0.0150581
GO:0071479~cellular response to ionizing radiation	4	1.10803	0.0315899
GO:0015914~phospholipid transport	4	1.10803	0.0315899
GO:0051603~proteolysis involved in cellular protein catabolic process	4	1.10803	0.0470714
GO:0009408~response to heat	4	1.10803	0.0470714
GO:0000301~retrograde transport, vesicle recycling within Golgi	3	0.831025	0.0116626
GO:1990253~cellular response to leucine starvation	3	0.831025	0.0167295
GO:0040015~negative regulation of multicellular organism growth	3	0.831025	0.0167295
GO:1903204~negative regulation of oxidative stress-induced neuron death	3	0.831025	0.0225613
GO:0048009~insulin-like growth factor receptor signaling pathway	3	0.831025	0.0225613
GO:0051146~striated muscle cell differentiation	3	0.831025	0.0291016
GO:0016572~histone phosphorylation	3	0.831025	0.0291016
GO:0070085~glycosylation	3	0.831025	0.0362967
GO:0033365~protein localization to organelle	3	0.831025	0.0362967
GO:0009416~response to light stimulus	3	0.831025	0.0401238
GO:1904262~negative regulation of TORC1 signaling	3	0.831025	0.0440958
GO:0090201~negative regulation of release of cytochrome c from mitochondria	3	0.831025	0.0482067
GO:1901031~regulation of response to reactive oxygen species	2	0.554017	0.0497365
GO:0032387~negative regulation of intracellular transport	2	0.554017	0.0497365
